# Supplementary material for: Diterpenoids from Isodon species: an update
Source: Royal Society of Chemistry journal article supplement (doi:10.1039/c7np00027h), 2017-01-01
Supplement: c7np00027h1.pdf [file c7np00027h1.pdf]

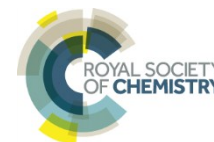

## Natural Product Reports

### REVIEW

### Supplementary Information for

## Diterpenoids from *Isodon* species: An update

Miao Liu,<sup>a,b</sup> Wei-Guang Wang,<sup>a</sup> Han-Dong Sun,<sup>a</sup> and Jian-Xin Pu<sup>a\*</sup>

<sup>a</sup> State Key Laboratory of Phytochemistry and Plant Resources in West China, Kunming Institute of Botany, Chinese Academy of Sciences, Kunming, 650201, Yunnan, P. R. China.

<sup>b</sup> University of Chinese Academy of Sciences, Beijing, 100049, P. R. China.

E-mail: pujianxin@mail.kib.ac.cn; Tel: +86 871 65223616

**Table S1:** *ent*-kauranoids from *Isodon* species.

| No. | Names             | Species                                    | Regions                        | Ref.  |
|-----|-------------------|--------------------------------------------|--------------------------------|-------|
| 1   | Excisusin F       | <i>I. excisus</i>                          | Unknown                        | 38    |
| 2   | Albopilosin B     | <i>I. albopilosus</i>                      | Maoxian, Sichuan Prov.         | 40    |
| 3   | Albopilosin C     | <i>I. albopilosus</i>                      | Maoxian, Sichuan Prov.         | 40    |
| 4   | Albopilosin D     | <i>I. albopilosus</i>                      | Maoxian, Sichuan Prov.         | 40    |
| 5   | Albopilosin E     | <i>I. albopilosus</i>                      | Maoxian, Sichuan Prov.         | 40    |
| 6   | Albopilosin F     | <i>I. albopilosus</i>                      | Maoxian, Sichuan Prov.         | 40    |
| 7   | Albopilosin G     | <i>I. albopilosus</i>                      | Maoxian, Sichuan Prov.         | 40    |
| 8   | Albopilosin H     | <i>I. albopilosus</i>                      | Maoxian, Sichuan Prov.         | 40    |
| 9   | Albopilosin I     | <i>I. albopilosus</i>                      | Maoxian, Sichuan Prov.         | 40    |
| 10  | Albopilosin J     | <i>I. albopilosus</i>                      | Maoxian, Sichuan Prov.         | 40    |
| 11  | Phyllostachysin D | <i>I. phyllostachys</i>                    | Zhongdian, Yunnan Prov.        | 41    |
| 12  | Phyllostachysin E | <i>I. phyllostachys</i>                    | Zhongdian, Yunnan Prov.        | 41    |
| 13  | Phyllostachysin F | <i>I. phyllostachys</i>                    | Zhongdian, Yunnan Prov.        | 41    |
| 14  | Phyllostachysin G | <i>I. phyllostachys</i>                    | Zhongdian, Yunnan Prov.        | 41    |
| 15  | Phyllostachysin H | <i>I. phyllostachys</i>                    | Zhongdian, Yunnan Prov.        | 41    |
| 16  | Parvifoline Z     | <i>I. parvifolia</i>                       | Maoxian, Sichuan Prov.         | 42    |
| 17  | Racemosin A       | <i>I. racemosa</i>                         | Xinglong Mountain, Gansu Prov. | 44    |
| 18  | Excisoidesin A    | <i>I. excisoides</i>                       | Luanchuan, Henan Prov.         | 45    |
| 19  | Excisusin A       | <i>I. excisus</i>                          | Hwacheon, Kangwondo, Korea     | 39    |
| 20  | Excisusin B       | <i>I. excisus</i>                          | Hwacheon, Kangwondo, Korea     | 39    |
| 21  | Excisusin C       | <i>I. excisus</i>                          | Hwacheon, Kangwondo, Korea     | 39    |
| 22  | Excisusin D       | <i>I. excisus</i>                          | Hwacheon, Kangwondo, Korea     | 39    |
| 23  | Excisusin E       | <i>I. excisus</i>                          | Hwacheon, Kangwondo, Korea     | 39    |
| 24  | glaucocalyxin F   | <i>I. japonica</i> var. <i>glaucocalyx</i> | Anshan, Liaoning Prov.         | 48/49 |
| 25  | glaucocalyxin X   | <i>I. japonica</i> var. <i>glaucocalyx</i> | Anshan, Liaoning Prov.         | 48/49 |
| 26  | Minheryin H       | <i>I. henryi</i>                           | Minhe, Qinghai Prov.           | 54    |
| 27  | Minheryin I       | <i>I. henryi</i>                           | Minhe, Qinghai Prov.           | 54    |
| 28  | Nervonin B        | <i>I. nervosus</i>                         | Xichang, Sichuan Prov.         | 56    |
| 29  | Nervonin C        | <i>I. nervosus</i>                         | Xichang, Sichuan Prov.         | 56    |
| 30  | Nervonin D        | <i>I. nervosus</i>                         | Xichang, Sichuan Prov.         | 56    |

|    |                                                                                             |                        |                                |    |
|----|---------------------------------------------------------------------------------------------|------------------------|--------------------------------|----|
| 31 | Nervonin E                                                                                  | <i>I. nervosus</i>     | Xichang, Sichuan Prov.         | 56 |
| 32 | Nervonin F                                                                                  | <i>I. nervosus</i>     | Xichang, Sichuan Prov.         | 56 |
| 33 | Nervonin G                                                                                  | <i>I. nervosus</i>     | Xichang, Sichuan Prov.         | 56 |
| 34 | Nervonin H                                                                                  | <i>I. nervosus</i>     | Xichang, Sichuan Prov.         | 56 |
| 35 | Nervonin I                                                                                  | <i>I. nervosus</i>     | Xichang, Sichuan Prov.         | 56 |
| 36 | Nervonin J                                                                                  | <i>I. nervosus</i>     | Xichang, Sichuan Prov.         | 56 |
| 37 | Pharicinin B                                                                                | <i>I. pharicus</i>     | Lhasa, Tibet Autonomous region | 57 |
| 38 | Pharicinin C                                                                                | <i>I. pharicus</i>     | Lhasa, Tibet Autonomous region | 57 |
| 39 | Pharicunin N                                                                                | <i>I. pharicus</i>     | Lhasa, Tibet Autonomous region | 59 |
| 40 | Pharicunin O                                                                                | <i>I. pharicus</i>     | Lhasa, Tibet Autonomous region | 59 |
| 41 | Pharicunin P                                                                                | <i>I. pharicus</i>     | Lhasa, Tibet Autonomous region | 59 |
| 42 | Pharicunin Q                                                                                | <i>I. pharicus</i>     | Lhasa, Tibet Autonomous region | 59 |
| 43 | Pharicunin R                                                                                | <i>I. pharicus</i>     | Lhasa, Tibet Autonomous region | 59 |
| 44 | 3-Epipseurata B                                                                             | <i>I. pharicus</i>     | Lhasa, Tibet Autonomous region | 60 |
| 45 | 12- <i>O</i> -acetylpsaurata B                                                              | <i>I. pharicus</i>     | Lhasa, Tibet Autonomous region | 60 |
| 46 | 7- <i>O</i> -Acetylpsaurata C                                                               | <i>I. pharicus</i>     | Lhasa, Tibet Autonomous region | 60 |
| 47 | 3 $\beta$ ,14 $\beta$ ,15 $\beta$ -Trihydroxy- <i>ent</i> -kaur-16-en-12-one                | <i>I. pharicus</i>     | Lhasa, Tibet Autonomous region | 60 |
| 48 | 3 $\beta$ ,12 $\alpha$ ,15 $\beta$ -Trihydroxy-14 $\beta$ -acetoxo- <i>ent</i> -kaur-16-ene | <i>I. pharicus</i>     | Lhasa, Tibet Autonomous region | 60 |
| 49 | 3 $\alpha$ ,7 $\alpha$ ,14 $\beta$ ,15 $\beta$ -Tetrahydroxy- <i>ent</i> -kaur-16-en-12-one | <i>I. pharicus</i>     | Lhasa, Tibet Autonomous region | 60 |
| 50 | 12-Deoxyisodomedin                                                                          | <i>I. pharicus</i>     | Lhasa, Tibet Autonomous region | 60 |
| 51 | Dihydropseurata F                                                                           | <i>I. pharicus</i>     | Lhasa, Tibet Autonomous region | 60 |
| 52 | 17-Methoxydihydropseurata C                                                                 | <i>I. pharicus</i>     | Lhasa, Tibet Autonomous region | 60 |
| 53 | Pseurata B acetonide                                                                        | <i>I. pharicus</i>     | Lhasa, Tibet Autonomous region | 60 |
| 54 | 3-Epipseurata B acetonide                                                                   | <i>I. pharicus</i>     | Lhasa, Tibet Autonomous region | 60 |
| 55 | 12-Deoxyisodomedin acetonide                                                                | <i>I. pharicus</i>     | Lhasa, Tibet Autonomous region | 60 |
| 56 | Pseurata B acetal                                                                           | <i>I. pharicus</i>     | Lhasa, Tibet Autonomous region | 60 |
| 57 | Isoscoparin D                                                                               | <i>I. scoparius</i>    | Shangri-La, Yunnan Prov.       | 64 |
| 58 | Isoscoparin E                                                                               | <i>I. scoparius</i>    | Shangri-La, Yunnan Prov.       | 64 |
| 59 | Isoscoparin F                                                                               | <i>I. scoparius</i>    | Shangri-La, Yunnan Prov.       | 64 |
| 60 | Isoscoparin G                                                                               | <i>I. scoparius</i>    | Shangri-La, Yunnan Prov.       | 64 |
| 61 | Isoscoparin H                                                                               | <i>I. scoparius</i>    | Shangri-La, Yunnan Prov.       | 64 |
| 62 | Isoscoparin I                                                                               | <i>I. scoparius</i>    | Shangri-La, Yunnan Prov.       | 64 |
| 63 | Isoscoparin J                                                                               | <i>I. scoparius</i>    | Shangri-La, Yunnan Prov.       | 64 |
| 64 | Isoscoparin K                                                                               | <i>I. scoparius</i>    | Shangri-La, Yunnan Prov.       | 64 |
| 65 | Isoscoparin L                                                                               | <i>I. scoparius</i>    | Shangri-La, Yunnan Prov.       | 64 |
| 66 | Minheryin A                                                                                 | <i>I. henryi</i>       | Minhe, Qinghai Prov.           | 55 |
| 67 | Minheryin B                                                                                 | <i>I. henryi</i>       | Minhe, Qinghai Prov.           | 55 |
| 68 | Minheryin C                                                                                 | <i>I. henryi</i>       | Minhe, Qinghai Prov.           | 55 |
| 69 | Minheryin D                                                                                 | <i>I. henryi</i>       | Minhe, Qinghai Prov.           | 55 |
| 70 | Minheryin E                                                                                 | <i>I. henryi</i>       | Minhe, Qinghai Prov.           | 55 |
| 71 | Minheryin F                                                                                 | <i>I. henryi</i>       | Minhe, Qinghai Prov.           | 55 |
| 72 | Minheryin G                                                                                 | <i>I. henryi</i>       | Minhe, Qinghai Prov.           | 55 |
| 73 | Taihangexcisoidesin A                                                                       | <i>I. excisoides</i>   | Taihang Mountains, Henan Prov. | 46 |
| 74 | Sculponeatin N <sub>1</sub>                                                                 | <i>I. sculponeata</i>  | Yunnan Prov.                   | 65 |
| 75 | Sculponeatin O                                                                              | <i>I. sculponeata</i>  | Yunnan Prov.                   | 65 |
| 76 | Maoesin E                                                                                   | <i>I. eriocalyx</i>    | Luding, Sichuan Prov.          | 66 |
| 77 | Pharicinin D                                                                                | <i>I. pharicus</i>     | Lhasa, Tibet Autonomous region | 58 |
| 78 | Pharicinin E                                                                                | <i>I. pharicus</i>     | Lhasa, Tibet Autonomous region | 58 |
| 79 | Pharicinin D acetal                                                                         | <i>I. pharicus</i>     | Lhasa, Tibet Autonomous region | 58 |
| 80 | Isoleuconin A                                                                               | <i>I. leucophyllus</i> | Shangri-La, Yunnan Prov.       | 68 |
| 81 | Isoleuconin B                                                                               | <i>I. leucophyllus</i> | Shangri-La, Yunnan Prov.       | 68 |
| 82 | Isoleuconin C                                                                               | <i>I. leucophyllus</i> | Shangri-La, Yunnan Prov.       | 68 |
| 83 | Isoadenolin N                                                                               | <i>I. adenolomus</i>   | Shangri-La, Yunnan Prov.       | 69 |
| 84 | Isoadenolin O                                                                               | <i>I. adenolomus</i>   | Shangri-La, Yunnan Prov.       | 69 |

|     |                                                                                                            |                                            |                                |       |
|-----|------------------------------------------------------------------------------------------------------------|--------------------------------------------|--------------------------------|-------|
| 85  | Pseurata H                                                                                                 | <i>I. pharicus</i>                         | Tibet Autonomous region        | 62    |
| 86  | 3 $\alpha$ ,17-dihydroxy-15(16)-ene-ent-kaur-7-one                                                         | <i>I. eriocalyx</i> var. <i>laxiflora</i>  | Yunnan Prov.                   | 67    |
| 87  | Jianshirubetin G                                                                                           | <i>I. rubescens</i>                        | Jianshi, Hubei Prov.           | 70    |
| 88  | 1 $\alpha$ ,7 $\alpha$ ,12 $\alpha$ ,14 $\beta$ ,19-Pentahydroxy-3 $\beta$ -acetoxy-ent-kaur-16-en-15-one  | <i>I. pharicus</i>                         | Lhasa, Tibet Autonomous Region | 61    |
| 89  | 7 $\alpha$ ,12 $\alpha$ ,14 $\beta$ -Trihydroxy-3 $\beta$ -acetoxy-ent-kaur-16-en-15-oxo-19-al             | <i>I. pharicus</i>                         | Lhasa, Tibet Autonomous Region | 61    |
| 90  | 3 $\beta$ ,7 $\alpha$ ,14 $\beta$ ,19-Tetrahydroxy-ent-kaur-16-en-12,15-dione                              | <i>I. pharicus</i>                         | Lhasa, Tibet Autonomous Region | 61    |
| 91  | 7 $\alpha$ ,14 $\beta$ ,15 $\beta$ -Trihydroxy-3 $\beta$ ,19-diacetoxy-ent-kaur-16-en-12-one               | <i>I. pharicus</i>                         | Lhasa, Tibet Autonomous Region | 61    |
| 92  | 16(S)-7 $\alpha$ ,14 $\beta$ -Dihydroxy-3 $\beta$ ,19-diacetoxy-17-methoxy-ent-kaur-12,15-dione            | <i>I. pharicus</i>                         | Lhasa, Tibet Autonomous Region | 61    |
| 93  | Pharicinin F acetonide                                                                                     | <i>I. pharicus</i>                         | Lhasa, Tibet Autonomous Region | 61    |
| 94  | Isopharicinin F acetonide                                                                                  | <i>I. pharicus</i>                         | Lhasa, Tibet Autonomous Region | 61    |
| 95  | Pharicinin D acetonide                                                                                     | <i>I. pharicus</i>                         | Lhasa, Tibet Autonomous Region | 61    |
| 96  | Glaucocalyxin H                                                                                            | <i>I. japonica</i> var. <i>glaucocalyx</i> | Weihui, Henan Prov.            | 50/51 |
| 97  | Glaucocalyxin I                                                                                            | <i>I. japonica</i> var. <i>glaucocalyx</i> | Weihui, Henan Prov.            | 50/51 |
| 98  | Glaucocalyxin J                                                                                            | <i>I. japonica</i> var. <i>glaucocalyx</i> | Weihui, Henan Prov.            | 50/51 |
| 99  | Glaucocalyxin G                                                                                            | <i>I. japonica</i> var. <i>glaucocalyx</i> | Antu, Jilin Prov.              | 52/53 |
| 100 | Hubeirubetin A                                                                                             | <i>I. rubescens</i>                        | Jianshi, Hubei Prov.           | 71    |
| 101 | Hubeirubetin B                                                                                             | <i>I. rubescens</i>                        | Jianshi, Hubei Prov.           | 71    |
| 102 | 3 $\alpha$ ,14 $\beta$ ,16 $\alpha$ -trihydroxy-ent-kaurane                                                | <i>I. japonica</i>                         | Yuntai Mountain, Henan Prov.   | 72    |
| 103 | Pseurata I                                                                                                 | <i>I. pharicus</i>                         | Tibet Autonomous region        | 103   |
| 104 | Wikstroemioidin E                                                                                          | <i>I. wikstroemioides</i>                  | Ranwu, Sichuan Prov.           | 73    |
| 105 | Wikstroemioidin F                                                                                          | <i>I. wikstroemioides</i>                  | Ranwu, Sichuan Prov.           | 73    |
| 106 | Wikstroemioidin G                                                                                          | <i>I. wikstroemioides</i>                  | Ranwu, Sichuan Prov.           | 73    |
| 107 | Wikstroemioidin H                                                                                          | <i>I. wikstroemioides</i>                  | Ranwu, Sichuan Prov.           | 73    |
| 108 | Wikstroemioidin I                                                                                          | <i>I. wikstroemioides</i>                  | Ranwu, Sichuan Prov.           | 73    |
| 109 | Wikstroemioidin J                                                                                          | <i>I. wikstroemioides</i>                  | Ranwu, Sichuan Prov.           | 73    |
| 110 | Wikstroemioidin K                                                                                          | <i>I. wikstroemioides</i>                  | Ranwu, Sichuan Prov.           | 73    |
| 111 | Wikstroemioidin L                                                                                          | <i>I. wikstroemioides</i>                  | Ranwu, Sichuan Prov.           | 73    |
| 112 | Wikstroemioidin M                                                                                          | <i>I. wikstroemioides</i>                  | Ranwu, Sichuan Prov.           | 73    |
| 113 | Wikstroemioidin N                                                                                          | <i>I. wikstroemioides</i>                  | Ranwu, Sichuan Prov.           | 73    |
| 114 | Wikstroemioidin O                                                                                          | <i>I. wikstroemioides</i>                  | Ranwu, Sichuan Prov.           | 73    |
| 115 | Wikstroemioidin P                                                                                          | <i>I. wikstroemioides</i>                  | Ranwu, Sichuan Prov.           | 73    |
| 116 | Wikstroemioidin Q                                                                                          | <i>I. wikstroemioides</i>                  | Ranwu, Sichuan Prov.           | 73    |
| 117 | Wikstroemioidin R                                                                                          | <i>I. wikstroemioides</i>                  | Ranwu, Sichuan Prov.           | 73    |
| 118 | Wikstroemioidin S                                                                                          | <i>I. wikstroemioides</i>                  | Ranwu, Sichuan Prov.           | 73    |
| 119 | 3 $\alpha$ ,7 $\beta$ -Dihydroxy-ent-kaur-16-en-15-one                                                     | <i>I. adenantha</i>                        | Cangshan, Yunnan Prov.         | 74    |
| 120 | 1 $\alpha$ -Hydroxy-8(17)-3 $\beta$ ,7 $\beta$ ,11 $\beta$ ,15 $\beta$ -tetraacetoxy-ent-kaur-16-en-15-one | <i>I. adenantha</i>                        | Cangshan, Yunnan Prov.         | 74    |
| 121 | Parvifolin                                                                                                 | <i>I. parvifolia</i>                       | Qinling Mountain, Shanxi Prov. | 43    |
| 122 | Tenuifolin A                                                                                               | <i>I. tenuifolius</i>                      | Shangri-La, Yunnan Prov.       | 75    |
| 123 | Tenuifolin B                                                                                               | <i>I. tenuifolius</i>                      | Shangri-La, Yunnan Prov.       | 75    |
| 124 | Tenuifolin C                                                                                               | <i>I. tenuifolius</i>                      | Shangri-La, Yunnan Prov.       | 75    |
| 125 | Tenuifolin D                                                                                               | <i>I. tenuifolius</i>                      | Shangri-La, Yunnan Prov.       | 75    |
| 126 | Tenuifolin E                                                                                               | <i>I. tenuifolius</i>                      | Shangri-La, Yunnan Prov.       | 75    |
| 127 | Tenuifolin F                                                                                               | <i>I. tenuifolius</i>                      | Shangri-La, Yunnan Prov.       | 75    |
| 128 | Tenuifolin G                                                                                               | <i>I. tenuifolius</i>                      | Shangri-La, Yunnan Prov.       | 75    |
| 129 | Tenuifolin H                                                                                               | <i>I. tenuifolius</i>                      | Shangri-La, Yunnan Prov.       | 75    |
| 130 | Tenuifolin I                                                                                               | <i>I. tenuifolius</i>                      | Shangri-La, Yunnan Prov.       | 75    |
| 131 | Tenuifolin J                                                                                               | <i>I. tenuifolius</i>                      | Shangri-La, Yunnan Prov.       | 75    |
| 132 | Tenuifolin K                                                                                               | <i>I. tenuifolius</i>                      | Shangri-La, Yunnan Prov.       | 75    |
| 133 | Tenuifolin L                                                                                               | <i>I. tenuifolius</i>                      | Shangri-La, Yunnan Prov.       | 75    |
| 134 | Tenuifolin M                                                                                               | <i>I. tenuifolius</i>                      | Shangri-La, Yunnan Prov.       | 75    |
| 135 | Maoecrystal X                                                                                              | <i>I. eriocalyx</i>                        | Lijing, Yunnan Prov.           | 76    |

|     |                                           |                         |                                 |    |
|-----|-------------------------------------------|-------------------------|---------------------------------|----|
| 136 | Maoecrystal Y                             | <i>I. eriocalyx</i>     | Lijiang, Yunnan Prov.           | 76 |
| 137 | 3-acetylmaoecrystal S                     | <i>I. eriocalyx</i>     | Lijiang, Yunnan Prov.           | 77 |
| 138 | Maoesin B                                 | <i>I. eriocalyx</i>     | Luding, Sichuan Prov.           | 66 |
| 139 | Maoesin C                                 | <i>I. eriocalyx</i>     | Luding, Sichuan Prov.           | 66 |
| 140 | Maoesin D                                 | <i>I. eriocalyx</i>     | Luding, Sichuan Prov.           | 66 |
| 141 | 6-acetylmaoecrystal B                     | <i>I. eriocalyx</i>     | Guiyang, Gouzhou Prov.          | 78 |
| 142 | Dayecrystal B                             | <i>I. macrophyllus</i>  | Tongbai, Henan Prov.            | 79 |
| 143 | Parvifoline C                             | <i>I. parvifolia</i>    | Maoxian, Sichuan Prov.          | 80 |
| 144 | Parvifoline D                             | <i>I. parvifolia</i>    | Maoxian, Sichuan Prov.          | 80 |
| 145 | Parvifoline E                             | <i>I. parvifolia</i>    | Maoxian, Sichuan Prov.          | 80 |
| 146 | Parvifoline F                             | <i>I. parvifolia</i>    | Maoxian, Sichuan Prov.          | 80 |
| 147 | Parvifoline G                             | <i>I. parvifolia</i>    | Maoxian, Sichuan Prov.          | 80 |
| 148 | Parvifoline H                             | <i>I. parvifolia</i>    | Maoxian, Sichuan Prov.          | 80 |
| 149 | Parvifoline I                             | <i>I. parvifolia</i>    | Maoxian, Sichuan Prov.          | 80 |
| 150 | Parvifoline J                             | <i>I. parvifolia</i>    | Maoxian, Sichuan Prov.          | 80 |
| 151 | Parvifoline K                             | <i>I. parvifolia</i>    | Maoxian, Sichuan Prov.          | 80 |
| 152 | Parvifoline O                             | <i>I. parvifolia</i>    | Maoxian, Sichuan Prov.          | 81 |
| 153 | Parvifoline P                             | <i>I. parvifolia</i>    | Maoxian, Sichuan Prov.          | 81 |
| 154 | Parvifoline Q                             | <i>I. parvifolia</i>    | Maoxian, Sichuan Prov.          | 81 |
| 155 | Parvifoline R                             | <i>I. parvifolia</i>    | Maoxian, Sichuan Prov.          | 81 |
| 156 | Parvifoline S                             | <i>I. parvifolia</i>    | Maoxian, Sichuan Prov.          | 81 |
| 157 | Parvifoline T                             | <i>I. parvifolia</i>    | Maoxian, Sichuan Prov.          | 81 |
| 158 | Parvifoline U                             | <i>I. parvifolia</i>    | Maoxian, Sichuan Prov.          | 81 |
| 159 | Parvifoline V                             | <i>I. parvifolia</i>    | Maoxian, Sichuan Prov.          | 81 |
| 160 | Parvifoline W                             | <i>I. parvifolia</i>    | Maoxian, Sichuan Prov.          | 81 |
| 161 | Hebeirubescensin A                        | <i>I. rubescens</i>     | Hehuachi herbal market, Sichuan | 82 |
| 162 | Hebeirubescensin B                        | <i>I. rubescens</i>     | Hehuachi herbal market, Sichuan | 82 |
| 163 | Hebeirubescensin C                        | <i>I. rubescens</i>     | Hehuachi herbal market, Sichuan | 82 |
| 164 | Hebeirubescensin D                        | <i>I. rubescens</i>     | Hehuachi herbal market, Sichuan | 82 |
| 165 | Hebeirubescensin E                        | <i>I. rubescens</i>     | Hehuachi herbal market, Sichuan | 82 |
| 166 | Hebeirubescensin F                        | <i>I. rubescens</i>     | Hehuachi herbal market, Sichuan | 82 |
| 167 | Hebeirubescensin G                        | <i>I. rubescens</i>     | Hehuachi herbal market, Sichuan | 82 |
| 168 | Hebeirubescensin H                        | <i>I. rubescens</i>     | Hehuachi herbal market, Sichuan | 82 |
| 169 | Hebeirubescensin I                        | <i>I. rubescens</i>     | Hehuachi herbal market, Sichuan | 82 |
| 170 | Hebeirubescensin J                        | <i>I. rubescens</i>     | Hehuachi herbal market, Sichuan | 82 |
| 171 | Hebeirubescensin K                        | <i>I. rubescens</i>     | Hehuachi herbal market, Sichuan | 82 |
| 172 | Hebeirubescensin L                        | <i>I. rubescens</i>     | Hehuachi herbal market, Sichuan | 82 |
| 173 | 11,15- <i>O,O</i> -diacetyl-rabdotermin D | <i>I. rubescens</i>     | Cultivated in Henan Prov.       | 83 |
| 174 | 16,17-exo-epoxide-oridonin                | <i>I. rubescens</i>     | Cultivated in Henan Prov.       | 83 |
| 175 | Jiyuanoridonin A                          | <i>I. rubescens</i>     | Jiyuan, Henan Prov.             | 84 |
| 176 | Xerophilusin III                          | <i>I. xerophilus</i>    | Yuanyang, Yunnan Prov.          | 85 |
| 177 | Xerophilusin IV                           | <i>I. xerophilus</i>    | Yuanyang, Yunnan Prov.          | 85 |
| 178 | Xerophilusin V                            | <i>I. xerophilus</i>    | Yuanyang, Yunnan Prov.          | 85 |
| 179 | Xerophilusin VI                           | <i>I. xerophilus</i>    | Yuanyang, Yunnan Prov.          | 85 |
| 180 | Xerophilusin VII                          | <i>I. xerophilus</i>    | Yuanyang, Yunnan Prov.          | 85 |
| 181 | Xerophilusin VIII                         | <i>I. xerophilus</i>    | Yuanyang, Yunnan Prov.          | 85 |
| 182 | Xerophilusin IX                           | <i>I. xerophilus</i>    | Yuanyang, Yunnan Prov.          | 85 |
| 183 | Xerophilusin X                            | <i>I. xerophilus</i>    | Yuanyang, Yunnan Prov.          | 85 |
| 184 | Xerophilusin XI                           | <i>I. xerophilus</i>    | Yuanyang, Yunnan Prov.          | 85 |
| 185 | Xerophilusin XII                          | <i>I. xerophilus</i>    | Yuanyang, Yunnan Prov.          | 85 |
| 186 | Xerophilusin XIII                         | <i>I. xerophilus</i>    | Yuanyang, Yunnan Prov.          | 85 |
| 187 | Xerophinoid B                             | <i>I. xerophilus</i>    | Jianshui, Yunnan Prov.          | 86 |
| 188 | Phyllostacin C                            | <i>I. phyllostachys</i> | Zhongdian, Yunnan Prov.         | 87 |
| 189 | Phyllostacin D                            | <i>I. phyllostachys</i> | Zhongdian, Yunnan Prov.         | 87 |
| 190 | Phyllostacin F                            | <i>I. phyllostachys</i> | Lijiang, Yunnan Prov.           | 88 |
| 191 | Phyllostacin G                            | <i>I. phyllostachys</i> | Lijiang, Yunnan Prov.           | 88 |
| 192 | Isodojaponin A                            | <i>I. japonica</i>      | Hwacheon, Kangwondo, Korea      | 89 |

|     |                                                                                                                           |                                             |                                 |         |
|-----|---------------------------------------------------------------------------------------------------------------------------|---------------------------------------------|---------------------------------|---------|
| 193 | Isodojaponin B                                                                                                            | <i>I. japonica</i>                          | Hwacheon, Kangwondo, Korea      | 89      |
| 194 | Isojaponin C                                                                                                              | <i>I. japonica</i>                          | Qinling Mountain, Shanxi Prov.  | 90      |
| 195 | Hikiokoshin D                                                                                                             | <i>I. japonica</i>                          | cultivated, Hokkaido University | 91      |
| 196 | Hikiokoshin E                                                                                                             | <i>I. japonica</i>                          | cultivated, Hokkaido University | 91      |
| 197 | Hikiokoshin F                                                                                                             | <i>I. japonica</i>                          | cultivated, Hokkaido University | 91      |
| 198 | Hikiokoshin G                                                                                                             | <i>I. japonica</i>                          | cultivated, Hokkaido University | 91      |
| 199 | Hikiokoshin H                                                                                                             | <i>I. japonica</i>                          | cultivated, Hokkaido University | 91      |
| 200 | Hikiokoshin I                                                                                                             | <i>I. japonica</i>                          | cultivated, Hokkaido University | 91      |
| 201 | Maoyecrystal L                                                                                                            | <i>I. japonica</i>                          | Tongbai, Henan Prov.            | 92      |
| 202 | 6 $\beta$ ,7 $\beta$ ,13 $\alpha$ -trihydroxy-1 $\alpha$ -acetoxy-7 $\alpha$ ,20-epoxy- <i>ent</i> -kaur-16-en-15-one     | <i>I. nervosus</i>                          | Tongbai, Henan Prov.            | 93/94   |
| 203 | Laxiflorin T                                                                                                              | <i>I. eriocalyx</i> var. <i>laxiflora</i>   | Yunnan Prov.                    | 98      |
| 204 | Neolaxiflorin G                                                                                                           | <i>I. eriocalyx</i> var. <i>laxiflora</i>   | Yunnan Prov.                    | 99      |
| 205 | Neolaxiflorin H                                                                                                           | <i>I. eriocalyx</i> var. <i>laxiflora</i>   | Yunnan Prov.                    | 99      |
| 206 | Neolaxiflorin I                                                                                                           | <i>I. eriocalyx</i> var. <i>laxiflora</i>   | Yunnan Prov.                    | 100     |
| 207 | Neolaxiflorin J                                                                                                           | <i>I. eriocalyx</i> var. <i>laxiflora</i>   | Yunnan Prov.                    | 100     |
| 208 | Neolaxiflorin K                                                                                                           | <i>I. eriocalyx</i> var. <i>laxiflora</i>   | Yunnan Prov.                    | 100     |
| 209 | Neolaxiflorin L                                                                                                           | <i>I. eriocalyx</i> var. <i>laxiflora</i>   | Yunnan Prov.                    | 100     |
| 210 | Neolaxiflorin M                                                                                                           | <i>I. eriocalyx</i> var. <i>laxiflora</i>   | Yunnan Prov.                    | 100     |
| 211 | Neolaxiflorin N                                                                                                           | <i>I. eriocalyx</i> var. <i>laxiflora</i>   | Yunnan Prov.                    | 100     |
| 212 | Neolaxiflorin O                                                                                                           | <i>I. eriocalyx</i> var. <i>laxiflora</i>   | Yunnan Prov.                    | 100     |
| 213 | Neolaxiflorin P                                                                                                           | <i>I. eriocalyx</i> var. <i>laxiflora</i>   | Yunnan Prov.                    | 100     |
| 214 | Neolaxiflorin Q                                                                                                           | <i>I. eriocalyx</i> var. <i>laxiflora</i>   | Yunnan Prov.                    | 100     |
| 215 | Neolaxiflorin R                                                                                                           | <i>I. eriocalyx</i> var. <i>laxiflora</i>   | Yunnan Prov.                    | 100     |
| 216 | Neolaxiflorin S                                                                                                           | <i>I. eriocalyx</i> var. <i>laxiflora</i>   | Yunnan Prov.                    | 100     |
| 217 | Neolaxiflorin T                                                                                                           | <i>I. eriocalyx</i> var. <i>laxiflora</i>   | Yunnan Prov.                    | 100     |
| 218 | Neolaxiflorin U                                                                                                           | <i>I. eriocalyx</i> var. <i>laxiflora</i>   | Yunnan Prov.                    | 100     |
| 219 | Neolaxiflorin V                                                                                                           | <i>I. eriocalyx</i> var. <i>laxiflora</i>   | Yunnan Prov.                    | 100     |
| 220 | Neolaxiflorin W                                                                                                           | <i>I. eriocalyx</i> var. <i>laxiflora</i>   | Yunnan Prov.                    | 100     |
| 221 | Neolaxiflorin X                                                                                                           | <i>I. eriocalyx</i> var. <i>laxiflora</i>   | Yunnan Prov.                    | 100     |
| 222 | Neolaxiflorin Y                                                                                                           | <i>I. eriocalyx</i> var. <i>laxiflora</i>   | Yunnan Prov.                    | 100     |
| 223 | rabdonervosin D                                                                                                           | <i>I. nervosus</i>                          | Yifeng, Jiangxi Prov.           | 95      |
| 224 | rabdonervosin G                                                                                                           | <i>I. nervosus</i>                          | Yifeng, Jiangxi Prov.           | 96      |
| 225 | 7 $\beta$ ,12 $\alpha$ -dihydroxy-6 $\beta$ ,15 $\beta$ -diacetoxy-7 $\alpha$ ,20-epoxy- <i>ent</i> -kaur-2,16-dien-1-one | <i>I. nervosus</i>                          | Tongbai, Henan Prov.            | 97      |
| 226 | Sculponin K                                                                                                               | <i>I. sculponeata</i>                       | Xichang, Sichuan Prov.          | 101     |
| 227 | Sculponin Y                                                                                                               | <i>I. sculponeata</i>                       | Muli, Sichuan Prov.             | 102     |
| 228 | Sculponin Z                                                                                                               | <i>I. sculponeata</i>                       | Muli, Sichuan Prov.             | 102     |
| 229 | Sinuolatin B                                                                                                              | <i>I. sinuolata</i>                         | Shangri-La, Yunnan Prov.        | 103     |
| 230 | Sinuolatin C                                                                                                              | <i>I. sinuolata</i>                         | Shangri-La, Yunnan Prov.        | 103     |
| 231 | Sinuolatin D                                                                                                              | <i>I. sinuolata</i>                         | Shangri-La, Yunnan Prov.        | 103     |
| 232 | Sculponin W                                                                                                               | <i>I. sculponeata</i>                       | Muli, Sichuan Prov.             | 102     |
| 233 | Sculponin L                                                                                                               | <i>I. sculponeata</i>                       | Xichang, Sichuan Prov.          | 101     |
| 234 | Sculponin X                                                                                                               | <i>I. sculponeata</i>                       | Muli, Sichuan Prov.             | 102     |
| 235 | Sinuolatin A                                                                                                              | <i>I. sinuolata</i>                         | Shangri-La, Yunnan Prov.        | 103     |
| 236 | Taihangexcisoidesin C                                                                                                     | <i>I. excisoides</i>                        | Taihang Mountains, Henan Prov.  | 104/105 |
| 237 | Rubluanin D                                                                                                               | <i>I. rubescens</i> var. <i>lushanensis</i> | Luanchuan, Henan Prov.          | 107     |
| 238 | Isolushinin B                                                                                                             | <i>I. rubescens</i> var. <i>lushiensis</i>  | Lushi, Henan Prov.              | 108     |
| 239 | Isolushinin C                                                                                                             | <i>I. rubescens</i> var. <i>lushiensis</i>  | Lushi, Henan Prov.              | 108     |
| 240 | Rubluanin A                                                                                                               | <i>I. rubescens</i> var. <i>lushanensis</i> | Luanchuan, Henan Prov.          | 107     |
| 241 | Rubluanin B                                                                                                               | <i>I. rubescens</i> var. <i>lushanensis</i> | Luanchuan, Henan Prov.          | 107     |
| 242 | Rubluanin C                                                                                                               | <i>I. rubescens</i> var. <i>lushanensis</i> | Luanchuan, Henan Prov.          | 107     |
| 243 | Isolushinin D                                                                                                             | <i>I. rubescens</i> var. <i>lushiensis</i>  | Lushi, Henan Prov.              | 108     |
| 244 | Isolushinin E                                                                                                             | <i>I. rubescens</i> var. <i>lushiensis</i>  | Lushi, Henan Prov.              | 108     |
| 245 | Isolushinin F                                                                                                             | <i>I. rubescens</i> var. <i>lushiensis</i>  | Lushi, Henan Prov.              | 108     |
| 246 | 1 $\alpha$ -acetoxy-14 $\beta$ -hydroxy-7 $\alpha$ ,20-epoxy- <i>ent</i> -kaur-16-en-15-one                               | <i>I. excisoides</i>                        | Luanchuan, Henan Prov.          | 106     |

|     |                                                                                                                        |                                           |                               |     |
|-----|------------------------------------------------------------------------------------------------------------------------|-------------------------------------------|-------------------------------|-----|
| 247 | 15-acetyldemethylkamebacetal A                                                                                         | <i>I. inflexus</i>                        | Jeju, Korea                   | 109 |
| 248 | Isoadenolin D                                                                                                          | <i>I. adenolomus</i>                      | Shangri-La, Yunnan Prov.      | 110 |
| 249 | Isoadenolin E                                                                                                          | <i>I. adenolomus</i>                      | Shangri-La, Yunnan Prov.      | 110 |
| 250 | Isoadenolin F                                                                                                          | <i>I. adenolomus</i>                      | Shangri-La, Yunnan Prov.      | 110 |
| 251 | Isoadenolin G                                                                                                          | <i>I. adenolomus</i>                      | Shangri-La, Yunnan Prov.      | 110 |
| 252 | Isoadenolin H                                                                                                          | <i>I. adenolomus</i>                      | Shangri-La, Yunnan Prov.      | 110 |
| 253 | Isoadenolin I                                                                                                          | <i>I. adenolomus</i>                      | Shangri-La, Yunnan Prov.      | 110 |
| 254 | Isoadenolin J                                                                                                          | <i>I. adenolomus</i>                      | Shangri-La, Yunnan Prov.      | 110 |
| 255 | Isoadenolin K                                                                                                          | <i>I. adenolomus</i>                      | Shangri-La, Yunnan Prov.      | 110 |
| 256 | Isorosthin K                                                                                                           | <i>I. rosthornii</i>                      | Qionglai, Sichuan Prov.       | 111 |
| 257 | Isorosthin L                                                                                                           | <i>I. rosthornii</i>                      | Qionglai, Sichuan Prov.       | 111 |
| 258 | Isorosthin F                                                                                                           | <i>I. rosthornii</i>                      | Qionglai, Sichuan Prov.       | 111 |
| 259 | Isorosthin G                                                                                                           | <i>I. rosthornii</i>                      | Qionglai, Sichuan Prov.       | 111 |
| 260 | Isorosthin H                                                                                                           | <i>I. rosthornii</i>                      | Qionglai, Sichuan Prov.       | 111 |
| 261 | Isorosthin I                                                                                                           | <i>I. rosthornii</i>                      | Qionglai, Sichuan Prov.       | 111 |
| 262 | Isorosthin M                                                                                                           | <i>I. rosthornii</i>                      | Qionglai, Sichuan Prov.       | 111 |
| 263 | Isorosthin N                                                                                                           | <i>I. rosthornii</i>                      | Qionglai, Sichuan Prov.       | 111 |
| 264 | Isorosthin O                                                                                                           | <i>I. rosthornii</i>                      | Qionglai, Sichuan Prov.       | 111 |
| 265 | 6 $\beta$ ,14 $\alpha$ -dihydroxy-1 $\alpha$ ,7 $\beta$ -diacetoxy-7 $\alpha$ ,20-epoxy- <i>ent</i> -kaur-16-en-15-one | <i>I. serra</i>                           | Luofu mountain, Guangdong     | 112 |
| 266 | Effusanin F                                                                                                            | <i>I. serra</i>                           | Luofu mountain, Guangdong     | 113 |
| 267 | Isodonhenrin D                                                                                                         | <i>I. henryi</i>                          | Sichuan Prov.                 | 114 |
| 268 | Isowikstroemin A                                                                                                       | <i>I. wikstroemioides</i>                 | Ranwu, Sichuan Prov.          | 115 |
| 269 | Isowikstroemin B                                                                                                       | <i>I. wikstroemioides</i>                 | Ranwu, Sichuan Prov.          | 115 |
| 270 | Isowikstroemin C                                                                                                       | <i>I. wikstroemioides</i>                 | Ranwu, Sichuan Prov.          | 115 |
| 271 | Isowikstroemin D                                                                                                       | <i>I. wikstroemioides</i>                 | Ranwu, Sichuan Prov.          | 115 |
| 272 | Isowikstroemin E                                                                                                       | <i>I. wikstroemioides</i>                 | Ranwu, Sichuan Prov.          | 115 |
| 273 | Isowikstroemin F                                                                                                       | <i>I. wikstroemioides</i>                 | Ranwu, Sichuan Prov.          | 115 |
| 274 | Isowikstroemin G                                                                                                       | <i>I. wikstroemioides</i>                 | Ranwu, Sichuan Prov.          | 115 |
| 275 | 15-acetylmegathyrin B                                                                                                  | <i>I. serra</i>                           | E'mei Mountain, Sichuan Prov. | 116 |
| 276 | Serrin E                                                                                                               | <i>I. serra</i>                           | E'mei Mountain, Sichuan Prov. | 116 |
| 277 | 14 $\beta$ -hydroxyrabdocoestin A                                                                                      | <i>I. serra</i>                           | E'mei Mountain, Sichuan Prov. | 116 |
| 278 | Serrin F                                                                                                               | <i>I. serra</i>                           | E'mei Mountain, Sichuan Prov. | 116 |
| 279 | Serrin G                                                                                                               | <i>I. serra</i>                           | E'mei Mountain, Sichuan Prov. | 116 |
| 280 | 11- <i>epi</i> -rabdocoestin A                                                                                         | <i>I. serra</i>                           | E'mei Mountain, Sichuan Prov. | 116 |
| 281 | Serrin H                                                                                                               | <i>I. serra</i>                           | E'mei Mountain, Sichuan Prov. | 116 |
| 282 | Serrin I                                                                                                               | <i>I. serra</i>                           | E'mei Mountain, Sichuan Prov. | 116 |
| 283 | 15-acetylenanderianin N                                                                                                | <i>I. serra</i>                           | E'mei Mountain, Sichuan Prov. | 116 |
| 284 | 6 $\beta$ ,13 $\alpha$ ,15 $\beta$ -trihydroxy-16-ene-3 $\alpha$ ,20-epoxy- <i>ent</i> -kaur-1,7-dione                 | <i>I. eriocalyx</i> var. <i>laxiflora</i> | Yunnan Prov.                  | 67  |
| 285 | 6-hydroxy-3 $\alpha$ ,20-epoxy-5(6)-ene- <i>ent</i> -kaur-1,7,15-trione                                                | <i>I. eriocalyx</i> var. <i>laxiflora</i> | Yunnan Prov.                  | 67  |
| 286 | 6-hydroxy-15 $\beta$ -acetoxy-3 $\alpha$ ,20-epoxy-16 $\beta$ ,17-epoxy-5(6)-ene- <i>ent</i> -kaur-1,7-dione           | <i>I. eriocalyx</i> var. <i>laxiflora</i> | Yunnan Prov.                  | 67  |
| 287 | Laxiflorin R                                                                                                           | <i>I. eriocalyx</i> var. <i>laxiflora</i> | Yunnan Prov.                  | 117 |
| 288 | Jianshirubetin H                                                                                                       | <i>I. rubescens</i>                       | Jianshi, Hubei Prov.          | 70  |
| 289 | Isorosthornin F                                                                                                        | <i>I. rosthornii</i>                      | Qionglai, Sichuan Prov.       | 119 |
| 290 | Rabdonervosin J                                                                                                        | <i>I. nervosus</i>                        | Yifeng, Jiangxi Prov.         | 96  |
| 291 | Laxiflorol B                                                                                                           | <i>I. eriocalyx</i> var. <i>laxiflora</i> | Yunnan Prov.                  | 118 |
| 292 | Jianshirubetin D                                                                                                       | <i>I. rubescens</i>                       | Jianshi, Hubei Prov.          | 120 |
| 293 | Jianshirubetin E                                                                                                       | <i>I. rubescens</i>                       | Jianshi, Hubei Prov.          | 120 |
| 294 | Jianshirubetin F                                                                                                       | <i>I. rubescens</i>                       | Jianshi, Hubei Prov.          | 120 |
| 295 | Isorosthornin E                                                                                                        | <i>I. rosthornii</i>                      | Qionglai, Sichuan Prov.       | 119 |
| 296 | Isowikstroemin H                                                                                                       | <i>I. wikstroemioides</i>                 | Ranwu, Sichuan Prov.          | 121 |
| 297 | Isowikstroemin I                                                                                                       | <i>I. wikstroemioides</i>                 | Ranwu, Sichuan Prov.          | 121 |
| 298 | Isowikstroemin J                                                                                                       | <i>I. wikstroemioides</i>                 | Ranwu, Sichuan Prov.          | 121 |
| 299 | Isowikstroemin K                                                                                                       | <i>I. wikstroemioides</i>                 | Ranwu, Sichuan Prov.          | 121 |

|     |                                                                                                               |                                                |                                                        |         |
|-----|---------------------------------------------------------------------------------------------------------------|------------------------------------------------|--------------------------------------------------------|---------|
| 300 | Isowikstroemin L                                                                                              | <i>I. wikstroemioides</i>                      | Ranwu, Sichuan Prov.                                   | 121     |
| 301 | Isowikstroemin M                                                                                              | <i>I. wikstroemioides</i>                      | Ranwu, Sichuan Prov.                                   | 121     |
| 302 | Isolushinin A                                                                                                 | <i>I. rubescens</i> var. <i>lushiensis</i>     | Lushi, Henan Prov.                                     | 108     |
| 303 | Phyllostacin H                                                                                                | <i>I. phyllostachys</i>                        | Lijiang, Yunnan Prov.                                  | 88      |
| 304 | Phyllostacin I                                                                                                | <i>I. phyllostachys</i>                        | Lijiang, Yunnan Prov.                                  | 88      |
| 305 | Isoadenolin A                                                                                                 | <i>I. adenolomus</i>                           | Shangri-La, Yunnan Prov.                               | 110     |
| 306 | Isoadenolin B                                                                                                 | <i>I. adenolomus</i>                           | Shangri-La, Yunnan Prov.                               | 110     |
| 307 | Isoadenolin C                                                                                                 | <i>I. adenolomus</i>                           | Shangri-La, Yunnan Prov.                               | 110     |
| 308 | Isorosthornin A                                                                                               | <i>I. rosthornii</i>                           | Sichuan Prov.                                          | 124     |
| 309 | Isorosthornin B                                                                                               | <i>I. rosthornii</i>                           | Sichuan Prov.                                          | 124     |
| 310 | Isorosthornin C                                                                                               | <i>I. rosthornii</i>                           | Sichuan Prov.                                          | 124     |
| 311 | Jianshirubesin I                                                                                              | <i>I. rubescens</i>                            | Jianshi, Hubei Prov.                                   | 70      |
| 312 | Isodonhenrin C                                                                                                | <i>I. henryi</i>                               | Sichuan Prov.                                          | 114     |
| 313 | Rabdonervosin E                                                                                               | <i>I. nervosus</i>                             | Yifeng, Jiangxi Prov.                                  | 95      |
| 314 | Isorosthin J                                                                                                  | <i>I. rosthornii</i>                           | Qionglai, Sichuan Prov.                                | 111     |
| 315 | Sculponin U                                                                                                   | <i>I. sculponeata</i>                          | Muli, Sichuan Prov.                                    | 102     |
| 316 | Sculponin V                                                                                                   | <i>I. sculponeata</i>                          | Muli, Sichuan Prov.                                    | 102     |
| 317 | Isoadenolin L                                                                                                 | <i>I. adenolomus</i>                           | Shangri-La, Yunnan Prov.                               | 110     |
| 318 | Isodonhenrin E                                                                                                | <i>I. henryi</i>                               | Sichuan Prov.                                          | 114     |
| 319 | Isolushinin G                                                                                                 | <i>I. rubescens</i> var. <i>lushiensis</i>     | Lushi, Henan Prov.                                     | 108     |
| 320 | Isolushinin H                                                                                                 | <i>I. rubescens</i> var. <i>lushiensis</i>     | Lushi, Henan Prov.                                     | 108     |
| 321 | Isolushinin I                                                                                                 | <i>I. rubescens</i> var. <i>lushiensis</i>     | Lushi, Henan Prov.                                     | 108     |
| 322 | Isolushinin J                                                                                                 | <i>I. rubescens</i> var. <i>lushiensis</i>     | Lushi, Henan Prov.                                     | 108     |
| 323 | Wikstroemioidin T                                                                                             | <i>I. wikstroemioides</i>                      | Ranwu, Sichuan Prov.                                   | 73      |
| 324 | Wikstroemioidin U                                                                                             | <i>I. wikstroemioides</i>                      | Ranwu, Sichuan Prov.                                   | 73      |
| 325 | Wikstroemioidin V                                                                                             | <i>I. wikstroemioides</i>                      | Ranwu, Sichuan Prov.                                   | 73      |
| 326 | Xerophilinoid A                                                                                               | <i>I. xerophilus</i>                           | Yuanyang, Yunnan Prov.                                 | 86      |
| 327 | Xerophilusin I                                                                                                | <i>I. xerophilus</i>                           | Yuanyang, Yunnan Prov.                                 | 85      |
| 328 | Xerophilusin II                                                                                               | <i>I. xerophilus</i>                           | Yuanyang, Yunnan Prov.                                 | 85      |
| 329 | <i>ent</i> -7 $\alpha$ ,14 $\beta$ -dihydroxykaur-16-en-15-one-20-oic acid                                    | <i>I. excisoides</i>                           | Enshi, Hubei, Prov.                                    | 125     |
| 330 | 1 $\alpha$ ,7 $\alpha$ ,14 $\beta$ -trihydroxy-20-acetoxy- <i>ent</i> -kaur-15-one                            | <i>I. excisoides</i>                           | Luanchuan, Henan Prov.                                 | 106     |
| 331 | 1 $\alpha$ ,7 $\alpha$ ,14 $\beta$ ,18-tetrahydroxy-20-acetoxy- <i>ent</i> -kaur-15-one                       | <i>I. excisoides</i>                           | Luanchuan, Henan Prov.                                 | 106     |
| 332 | <i>ent</i> -1 $\alpha$ ,7 $\alpha$ ,14 $\beta$ ,20-tetrahydroxy-11,16-kauradien-15-one                        | <i>I. serra</i>                                | Anguo herbal market, Hebei Prov.                       | 126     |
| 333 | Dayecrystal A                                                                                                 | <i>I. macrophyllus</i>                         | Tongbai, Henan Prov.                                   | 79      |
| 334 | Lophanthodin G                                                                                                | <i>I. lophanthoides</i> var. <i>geradianus</i> | Baoshan, Yunnan Prov.                                  | 127     |
| 335 | Luanchunin B                                                                                                  | <i>I. rubescens</i> var. <i>lushanensis</i>    | Lushan, Henan Prov.                                    | 128     |
| 336 | 1,7 $\alpha$ ,12 $\beta$ ,14 $\beta$ -tetrahydroxy-1,10-seco- <i>ent</i> -kaur-10,16-dien-15-one              | <i>I. excisoides</i>                           | Enshi, Hubei Prov.                                     | 125     |
| 337 | Phyllostacin A                                                                                                | <i>I. phyllostachys</i>                        | Zhongdian, Yunnan Prov.                                | 129     |
| 338 | Phyllostacin B                                                                                                | <i>I. phyllostachys</i>                        | Zhongdian, Yunnan Prov.                                | 129     |
| 339 | 15 $\alpha$ ,20 $\beta$ -dihydroxy-6 $\beta$ -methoxy-6,7-seco-6,20-epoxy- <i>ent</i> -kaur-16-en-1,7-olide   | <i>I. serra</i>                                | Henan Prov.                                            | 130/131 |
| 340 | Isojaponin A                                                                                                  | <i>I. japonica</i><br><i>I. nervosus</i>       | Qinling Mountain, Shanxi Prov.<br>Tongbai, Henan Prov. | 132/133 |
| 341 | Macrocalyxin J                                                                                                | <i>I. macrocalyx</i>                           | Tianmu mountain, Zhejiang Prov.                        | 134     |
| 342 | Sinuolatin E                                                                                                  | <i>I. sinuolata</i>                            | Shangri-La, Yunnan Prov.                               | 103     |
| 343 | Dayecrystal D                                                                                                 | <i>I. macrophyllus</i>                         | Tongbai, Henan Prov.                                   | 135     |
| 344 | Sculponin F                                                                                                   | <i>I. sculponeata</i>                          | Xichang, Sichuan Prov.                                 | 101     |
| 345 | Sculponeatin R                                                                                                | <i>I. sculponeata</i>                          | Lijiang, Yunnan Prov.                                  | 136     |
| 346 | Rabdonervosin F                                                                                               | <i>I. nervosus</i>                             | Yifeng, Jiangxi Prov.                                  | 95      |
| 347 | Isodonhenrin B                                                                                                | <i>I. henryi</i>                               | Qionglai, Sichuan Prov.                                | 114     |
| 348 | 6 $\beta$ -butyroxy-3 $\beta$ -hydroxy-6,7-seco-6,20-epoxy-7,1 $\alpha$ -olide- <i>ent</i> -kaur-16-en-15-one | <i>I. japonica</i>                             | Qinyuan, Shanxi Prov.                                  | 137     |

|     |                                                                                                                |                                         |                                                 |         |
|-----|----------------------------------------------------------------------------------------------------------------|-----------------------------------------|-------------------------------------------------|---------|
| 349 | Serrin D                                                                                                       | <i>I. serra</i>                         | Shennongjia Mountain, Hubei Prov.               | 138     |
| 350 | Rabdonervosin H                                                                                                | <i>I. nervosus</i>                      | Yifeng, Jiangxi Prov.                           | 96      |
| 351 | Isorothornin G                                                                                                 | <i>I. rosthornii</i>                    | Qionglai, Sichuan Prov.                         | 119     |
| 352 | Isorosthin C                                                                                                   | <i>I. rosthornii</i>                    | Qionglai, Sichuan Prov.                         | 111     |
| 353 | Isorosthin D                                                                                                   | <i>I. rosthornii</i>                    | Qionglai, Sichuan Prov.                         | 111     |
| 354 | Isorosthin E                                                                                                   | <i>I. rosthornii</i>                    | Qionglai, Sichuan Prov.                         | 111     |
| 355 | Phyllostacin M                                                                                                 | <i>I. phyllostachys</i>                 | Muli and Yanyuan, Sichuan Prov.                 | 143     |
| 356 | 20-epiphyllostacin M                                                                                           | <i>I. phyllostachys</i>                 | Muli and Yanyuan, Sichuan Prov.                 | 143     |
| 357 | 11-epitaibaijaponicain A                                                                                       | <i>I. phyllostachys</i>                 | Muli and Yanyuan, Sichuan Prov.                 | 143     |
| 358 | 11,17-diepitaibaijaponicain A                                                                                  | <i>I. phyllostachys</i>                 | Muli and Yanyuan, Sichuan Prov.                 | 143     |
| 359 | Phyllostacin N                                                                                                 | <i>I. phyllostachys</i>                 | Muli and Yanyuan, Sichuan Prov.                 | 143     |
| 360 | 20-epiphyllostacin N                                                                                           | <i>I. phyllostachys</i>                 | Muli and Yanyuan, Sichuan Prov.                 | 143     |
| 361 | 17-epidihydroisodocarpin                                                                                       | <i>I. phyllostachys</i>                 | Muli and Yanyuan, Sichuan Prov.                 | 143     |
| 362 | 20-episerrin C                                                                                                 | <i>I. phyllostachys</i>                 | Muli and Yanyuan, Sichuan Prov.                 | 143     |
| 363 | Rabdosin F                                                                                                     | <i>I. serra</i>                         | Guangxi Prov.                                   | 139     |
| 364 | Rabdosin G                                                                                                     | <i>I. serra</i>                         | Guangxi Prov.                                   | 139     |
| 365 | Rabdosin H                                                                                                     | <i>I. serra</i>                         | Guangxi Prov.                                   | 139     |
| 366 | Rabdosin I                                                                                                     | <i>I. serra</i>                         | Guangxi Prov.                                   | 139     |
| 367 | Rabdosin J                                                                                                     | <i>I. serra</i>                         | Guangxi Prov.                                   | 139     |
| 368 | Sculponin P                                                                                                    | <i>I. sculponeata</i>                   | Muli, Sichuan Prov.                             | 140     |
| 369 | Sculponin Q                                                                                                    | <i>I. sculponeata</i>                   | Muli, Sichuan Prov.                             | 140     |
| 370 | Jianshirubesin B                                                                                               | <i>I. rubescens</i>                     | Jianshi, Hubei Prov.                            | 141     |
| 371 | Jianshirubesin C                                                                                               | <i>I. rubescens</i>                     | Jianshi, Hubei Prov.                            | 141     |
| 372 | Sculponin M                                                                                                    | <i>I. sculponeata</i>                   | Muli, Sichuan Prov.                             | 140     |
| 373 | Sculponin N                                                                                                    | <i>I. sculponeata</i>                   | Muli, Sichuan Prov.                             | 140     |
| 374 | Dayecrystal E                                                                                                  | <i>I. macrophyllus</i>                  | Tongbai, Henan Prov.                            | 135     |
| 375 | Sculponin B                                                                                                    | <i>I. sculponeata</i>                   | Xichang, Sichuan Prov.                          | 140     |
| 376 | Sculponin O                                                                                                    | <i>I. sculponeata</i>                   | Muli, Sichuan Prov.                             | 140     |
| 377 | Sculponin G                                                                                                    | <i>I. sculponeata</i>                   | Xichang, Sichuan Prov.                          | 101     |
| 378 | Sculponin H                                                                                                    | <i>I. sculponeata</i>                   | Xichang, Sichuan Prov.                          | 101     |
| 379 | Sculponin I                                                                                                    | <i>I. sculponeata</i>                   | Xichang, Sichuan Prov.                          | 101     |
| 380 | Sculponin J                                                                                                    | <i>I. sculponeata</i>                   | Xichang, Sichuan Prov.                          | 101     |
| 381 | Sculponeatin S                                                                                                 | <i>I. sculponeata</i>                   | Lijiang, Yunnan Prov.                           | 136     |
| 382 | Phyllostacin O                                                                                                 | <i>I. phyllostachys</i>                 | Muli and Yanyuan, Sichuan Prov.                 | 143     |
| 383 | 20-epiphyllostacin O                                                                                           | <i>I. phyllostachys</i>                 | Muli and Yanyuan, Sichuan Prov.                 | 143     |
| 384 | Phyllostacin L                                                                                                 | <i>I. phyllostachys</i>                 | Muli and Yanyuan, Sichuan Prov.                 | 143     |
| 385 | 15 $\beta$ -hydroxy-6,7-seco-6,11 $\beta$ :6,20-diepoxy-1 $\alpha$ ,7-olide- <i>ent</i> -kaur-16-ene           | <i>I. nervosus</i>                      | Tongbai, Henan Prov.                            | 93      |
| 386 | Sculponin A                                                                                                    | <i>I. sculponeata</i>                   | Xichang, Sichuan Prov.                          | 142     |
| 387 | 6,20,15 $\alpha$ -trihydroxy-6,7-seco-1 $\alpha$ ,7-olide- <i>ent</i> -kaur-16-ene                             | <i>I. nervosus</i>                      | Xinyang, Henan Prov.                            | 97      |
| 388 | Maoesin A                                                                                                      | <i>I. eriocalyx</i>                     | Luding, Sichuan Prov.                           | 66      |
| 389 | 3 $\alpha$ -acetoxy-maoesin A                                                                                  | <i>I. eriocalyx</i>                     | Luding, Sichuan Prov.                           | 66      |
| 390 | 6 $\alpha$ ,15 $\alpha$ -dihydroxy-20-aldehyde-6,7-seco-6,11 $\alpha$ -epoxy- <i>ent</i> -kaur-16-en-1,7-olide | <i>I. serra</i>                         | Henan Prov.                                     | 130/131 |
| 391 | 15 $\alpha$ ,20-dihydroxy-6,7-seco- <i>ent</i> -kaur-16-ene-7,1 $\alpha$ (6,11 $\alpha$ )-diolide              | <i>I. japonica</i>                      | Shanxi Prov.                                    | 137     |
| 392 | 15 $\alpha$ -hydroxy-6,7-seco-1 $\alpha$ ,7:11 $\alpha$ ,6-diolide- <i>ent</i> -kaur-16-en                     | <i>I. coetsa</i>                        | ErLang Mountain, Sichuan Prov.                  | 144     |
| 393 | Isodonhenrin A                                                                                                 | <i>I. rubescens</i><br><i>I. henryi</i> | Huixian, Henan Prov.<br>Qionglai, Sichuan Prov. | 114/145 |
| 394 | 15 $\alpha$ -hydroxy-20-oxo-6,7-seco- <i>ent</i> -kaur-16-en-1,7 $\alpha$ (6,11 $\alpha$ )-diolide             | <i>I. rubescens</i>                     | Huixian, Henan Prov.                            | 145     |
| 395 | Isorosthin B                                                                                                   | <i>I. rosthornii</i>                    | Qionglai, Sichuan Prov.                         | 111     |
| 396 | Jianshirubesin A                                                                                               | <i>I. rubescens</i>                     | Jianshi, Hubei Prov.                            | 141     |
| 397 | Sculponin R                                                                                                    | <i>I. sculponeata</i>                   | Muli, Sichuan Prov.                             | 140     |
| 398 | Sculponin S                                                                                                    | <i>I. sculponeata</i>                   | Muli, Sichuan Prov.                             | 140     |



|     |                                                                               |                                           |                                   |       |
|-----|-------------------------------------------------------------------------------|-------------------------------------------|-----------------------------------|-------|
| 399 | Phyllostacin J                                                                | <i>I. phyllostachys</i>                   | Muli and Yanyuan, Sichuan Prov.   | 143   |
| 400 | Phyllostacin K                                                                | <i>I. phyllostachys</i>                   | Muli and Yanyuan, Sichuan Prov.   | 143   |
| 401 | Rabdosin E                                                                    | <i>I. serra</i>                           | Guangxi Prov.                     | 139   |
| 402 | epi-maoecrystal N                                                             | <i>I. eriocalyx</i>                       | Lijiang, Yunnan Prov.             | 76    |
| 403 | Eriocalyxin G                                                                 | <i>I. eriocalyx</i>                       | Lijiang, Yunnan Prov.             | 76    |
| 404 | Maoecrystal W                                                                 | <i>I. eriocalyx</i>                       | Lijiang, Yunnan Prov.             | 76    |
| 405 | 6-hydroxy-1 $\alpha$ ,19-diacetoxy-6,7-seco-ent-kaur-16-en-15-one-7,20-olide  | <i>I. japonica</i>                        | Hwacheon, Kangwondo, Korea        | 89    |
| 406 | 19-hydroxy-1 $\alpha$ ,6-diacetoxy-6,7-seco-ent-kaur-16-en-15-one-7,20-olide  | <i>I. japonica</i>                        | Hwacheon, Kangwondo, Korea        | 89    |
| 407 | 6-aldehyde-1 $\alpha$ ,19-diacetoxy-6,7-seco-ent-kaur-16-en-15-one-7,20-olide | <i>I. japonica</i>                        | Hwacheon, Kangwondo, Korea        | 89    |
| 408 | Isorubescinsin A                                                              | <i>I. rubescens</i>                       | Lushi, Henan Prov.                | 146   |
| 409 | Isorubescinsin B                                                              | <i>I. rubescens</i>                       | Lushi, Henan Prov.                | 146   |
| 410 | Isorubescinsin C                                                              | <i>I. rubescens</i>                       | Lushi, Henan Prov.                | 146   |
| 411 | Isorubescinsin D                                                              | <i>I. rubescens</i>                       | Lushi, Henan Prov.                | 146   |
| 412 | Parvifoline AB                                                                | <i>I. parvifolia</i>                      | Maoxian, Sichuan Prov.            | 42    |
| 413 | Isojaponin B                                                                  | <i>I. japonica</i>                        | Qinling Mountain, Shanxi Prov.    | 132   |
| 414 | Taihangexcisoidesin B                                                         | <i>I. excisoides</i>                      | Taihang Mountains, Henan Prov.    | 46/47 |
| 415 | Maoesin F                                                                     | <i>I. eriocalyx</i>                       | Luding, Sichuan Prov.             | 66    |
| 416 | Ternifolide C                                                                 | <i>I. ternifolius</i>                     | Jinxiu, Guangxi Prov.             | 147   |
| 417 | Sculponein T                                                                  | <i>I. sculponeata</i>                     | Muli, Sichuan Prov.               | 148   |
| 418 | Hikiokoshin C                                                                 | <i>I. japonica</i>                        | Cultivated at Hokkaido University | 91    |
| 419 | Rabdosin K                                                                    | <i>I. serra</i>                           | Guangxi Prov.                     | 139   |
| 420 | Sculponeatin N                                                                | <i>I. sculponeata</i>                     | Lijiang, Yunnan Prov.             | 136   |
| 421 | Sculponeatin O                                                                | <i>I. sculponeata</i>                     | Lijiang, Yunnan Prov.             | 136   |
| 422 | Sculponeatin P                                                                | <i>I. sculponeata</i>                     | Lijiang, Yunnan Prov.             | 136   |
| 423 | Laxiflorolide H                                                               | <i>I. eriocalyx</i> var. <i>laxiflora</i> | Xishuangbanna, Yunnan Prov.       | 149   |
| 424 | Laxiflorolide I                                                               | <i>I. eriocalyx</i> var. <i>laxiflora</i> | Xishuangbanna, Yunnan Prov.       | 149   |
| 425 | Laxiflorolide K                                                               | <i>I. eriocalyx</i> var. <i>laxiflora</i> | Xishuangbanna, Yunnan Prov.       | 149   |
| 426 | Laxiflorolide L                                                               | <i>I. eriocalyx</i> var. <i>laxiflora</i> | Xishuangbanna, Yunnan Prov.       | 149   |
| 427 | Laxiflorolide N                                                               | <i>I. eriocalyx</i> var. <i>laxiflora</i> | Xishuangbanna, Yunnan Prov.       | 149   |
| 428 | Laxiflorolide O                                                               | <i>I. eriocalyx</i> var. <i>laxiflora</i> | Xishuangbanna, Yunnan Prov.       | 149   |
| 429 | Laxiflorolide P                                                               | <i>I. eriocalyx</i> var. <i>laxiflora</i> | Xishuangbanna, Yunnan Prov.       | 149   |
| 430 | Laxiflorolide Q                                                               | <i>I. eriocalyx</i> var. <i>laxiflora</i> | Xishuangbanna, Yunnan Prov.       | 149   |
| 431 | Laxiflorolide R                                                               | <i>I. eriocalyx</i> var. <i>laxiflora</i> | Xishuangbanna, Yunnan Prov.       | 149   |
| 432 | Laxiflorolide T                                                               | <i>I. eriocalyx</i> var. <i>laxiflora</i> | Xishuangbanna, Yunnan Prov.       | 149   |
| 433 | Laxiflorolide J                                                               | <i>I. eriocalyx</i> var. <i>laxiflora</i> | Xishuangbanna, Yunnan Prov.       | 149   |
| 434 | Laxiflorolide E                                                               | <i>I. eriocalyx</i> var. <i>laxiflora</i> | Xishuangbanna, Yunnan Prov.       | 149   |
| 435 | Laxiflorolide F                                                               | <i>I. eriocalyx</i> var. <i>laxiflora</i> | Xishuangbanna, Yunnan Prov.       | 149   |
| 436 | Laxiflorolide G                                                               | <i>I. eriocalyx</i> var. <i>laxiflora</i> | Xishuangbanna, Yunnan Prov.       | 149   |
| 437 | Laxiflorolide S                                                               | <i>I. eriocalyx</i> var. <i>laxiflora</i> | Xishuangbanna, Yunnan Prov.       | 149   |
| 438 | Phyllostacin E                                                                | <i>I. phyllostachys</i>                   | Zhongdian, Yunnan Prov.           | 87    |
| 439 | Sculponeatin Q                                                                | <i>I. sculponeata</i>                     | Lijiang, Yunnan Prov.,            | 136   |
| 440 | Sculponein C                                                                  | <i>I. sculponeata</i>                     | Xichang, Sichuan Prov.            | 142   |
| 441 | Laxiflorolide C                                                               | <i>I. eriocalyx</i> var. <i>laxiflora</i> | Xishuangbanna, Yunnan Prov.       | 149   |
| 442 | Laxiflorolide D                                                               | <i>I. eriocalyx</i> var. <i>laxiflora</i> | Xishuangbanna, Yunnan Prov.       | 149   |
| 443 | Maoecrystal Z                                                                 | <i>I. eriocalyx</i>                       | Weishan, Yunnan Prov.             | 152   |
| 444 | Hikiokoshin B                                                                 | <i>I. japonica</i>                        | cultivated at Hokkaido University | 91    |
| 445 | Parvifoline Y                                                                 | <i>I. parvifolia</i>                      | Maoxian, Sichuan Prov.            | 156   |
| 446 | Neolaxiflorin F                                                               | <i>I. eriocalyx</i> var. <i>laxiflora</i> | Yunnan Prov.                      | 99    |
| 447 | Parvifoline AA                                                                | <i>I. parvifolia</i>                      | Maoxian, Sichuan Prov.            | 42    |
| 448 | Isorosthin P                                                                  | <i>I. rosthornii</i>                      | Qionglai, Sichuan Prov.           | 111   |
| 449 | Bisrubescensin A                                                              | <i>I. rubescens</i>                       | Hehuachi herbal market, Sichuan   | 161   |
| 450 | Bisrubescensin B                                                              | <i>I. rubescens</i>                       | Hehuachi herbal market, Sichuan   | 161   |
| 451 | Bisrubescensin C                                                              | <i>I. rubescens</i>                       | Hehuachi herbal market, Sichuan   | 161   |
| 452 | Bisjaponin A                                                                  | <i>I. japonica</i>                        | Qinling Mountain, Shanxi Prov.    | 164   |

|     |                           |                                             |                                   |         |
|-----|---------------------------|---------------------------------------------|-----------------------------------|---------|
| 453 | Bisjaponin B              | <i>I. japonica</i>                          | Qinling Mountain, Shanxi Prov.    | 164     |
| 454 | Bisrubescensin D          | <i>I. rubescens</i>                         | Jiyuan Pharmaceutical company     | 162     |
| 455 | Bispseurata F             | <i>I. pharicus</i>                          | Lhasa, Tibet Autonomous region    | 57      |
| 456 | Sculpoinin D              | <i>I. sculponeata</i>                       | Xichang, Sichuan Prov.            | 101     |
| 457 | Sculpoinin E              | <i>I. sculponeata</i>                       | Xichang, Sichuan Prov.            | 101     |
| 458 | Bisleuconin A             | <i>I. leucophyllus</i>                      | Shangri-La, Yunnan Prov.          | 165     |
| 459 | Bisleuconin B             | <i>I. leucophyllus</i>                      | Shangri-La, Yunnan Prov.          | 165     |
| 460 | Bisleuconin C             | <i>I. leucophyllus</i>                      | Shangri-La, Yunnan Prov.          | 165     |
| 461 | Bisleuconin D             | <i>I. leucophyllus</i>                      | Shangri-La, Yunnan Prov.          | 165     |
| 462 | Biexcisusin A             | <i>I. excisus</i>                           | Hwacheon, Kangwondo, Korea        | 166     |
| 463 | Biexcisusin B             | <i>I. excisus</i>                           | Hwacheon, Kangwondo, Korea        | 166     |
| 464 | Biexcisusin C             | <i>I. excisus</i>                           | Hwacheon, Kangwondo, Korea        | 166     |
| 465 | Biexcisusin D             | <i>I. excisus</i>                           | Hwacheon, Kangwondo, Korea        | 166     |
| 466 | Biexcisusin E             | <i>I. excisus</i>                           | Hwacheon, Kangwondo, Korea        | 166     |
| 467 | Bisrubescensin E          | <i>I. rubescens</i>                         | Jiyuan, Henan Prov.               | 163     |
| 468 | Bistenuifolin A           | <i>I. tenuifolius</i>                       | Shangri-La, Yunnan Prov.          | 167     |
| 469 | Bistenuifolin B           | <i>I. tenuifolius</i>                       | Shangri-La, Yunnan Prov.          | 167     |
| 470 | Bistenuifolin C           | <i>I. tenuifolius</i>                       | Shangri-La, Yunnan Prov.          | 167     |
| 471 | Bistenuifolin D           | <i>I. tenuifolius</i>                       | Shangri-La, Yunnan Prov.          | 167     |
| 472 | Bistenuifolin E           | <i>I. tenuifolius</i>                       | Shangri-La, Yunnan Prov.          | 167     |
| 473 | Bistenuifolin F           | <i>I. tenuifolius</i>                       | Shangri-La, Yunnan Prov.          | 167     |
| 474 | Bistenuifolin G           | <i>I. tenuifolius</i>                       | Shangri-La, Yunnan Prov.          | 167     |
| 475 | Bistenuifolin H           | <i>I. tenuifolius</i>                       | Shangri-La, Yunnan Prov.          | 167     |
| 476 | Bistenuifolin I           | <i>I. tenuifolius</i>                       | Shangri-La, Yunnan Prov.          | 167     |
| 477 | Bistenuifolin J           | <i>I. tenuifolius</i>                       | Shangri-La, Yunnan Prov.          | 167     |
| 478 | Bistenuifolin K           | <i>I. tenuifolius</i>                       | Shangri-La, Yunnan Prov.          | 167     |
| 479 | Bistenuifolin L           | <i>I. tenuifolius</i>                       | Shangri-La, Yunnan Prov.          | 167     |
| 480 | Bistenuifolin M           | <i>I. tenuifolius</i>                       | Shangri-La, Yunnan Prov.          | 167     |
| 481 | Hispidanin A              | <i>I. hispida</i>                           | Dali, Yunnan Prov.                | 168     |
| 482 | Hispidanin B              | <i>I. hispida</i>                           | Dali, Yunnan Prov.                | 168     |
| 483 | Hispidanin C              | <i>I. hispida</i>                           | Dali, Yunnan Prov.                | 168     |
| 484 | Hispidanin D              | <i>I. hispida</i>                           | Dali, Yunnan Prov.                | 168     |
| 485 | Parvifoline X             | <i>I. parvifolia</i>                        | Maoxian, Sichuan Prov.            | 156     |
| 486 | Nervonin A                | <i>I. nervosus</i>                          | Xichang, Sichuan Prov.            | 56      |
| 487 | Luanchunin A              | <i>I. rubescens</i> var. <i>lushanensis</i> | Luanchuan, Henan Prov.            | 128     |
| 488 | Laxiflorin S              | <i>I. eriocalyx</i> var. <i>laxiflora</i>   | Yunnan Prov.                      | 98      |
| 489 | Acetonide of rabdoloxin A | <i>I. scoprius</i>                          | Shangri-La, Yunnan Prov.          | 64      |
| 490 | Taihangexcisoidesin D     | <i>I. excisoides</i>                        | Taihang Mountains, Henan Prov.    | 104/105 |
| 491 | Ternifolide A             | <i>I. ternifolius</i>                       | Jinxiu, Guangxi Prov.             | 147     |
| 492 | Ternifolide B             | <i>I. ternifolius</i>                       | Jinxiu, Guangxi Prov.             | 147     |
| 493 | Hikiokoshin A             | <i>I. japonica</i>                          | Cultivated at Hokkaido University | 91      |
| 494 | Laxiflorolide M           | <i>I. eriocalyx</i> var. <i>laxiflora</i>   | Yunnan Prov.                      | 149     |
| 495 | Neoadenoloxide A          | <i>I. adenolomus</i>                        | Shangrila, Yunnan Pro.            | 170     |
| 496 | Neolaxiflorin A           | <i>I. eriocalyx</i> var. <i>laxiflora</i>   | Yunnan Prov.                      | 171     |
| 497 | Neolaxiflorin B           | <i>I. eriocalyx</i> var. <i>laxiflora</i>   | Yunnan Prov.                      | 171     |
| 498 | Laxiflorolide A           | <i>I. eriocalyx</i> var. <i>laxiflora</i>   | Yunnan Prov.                      | 117     |
| 499 | Laxiflorolide B           | <i>I. eriocalyx</i> var. <i>laxiflora</i>   | Yunnan Prov.                      | 117     |
| 500 | Neolaxiflorin D           | <i>I. eriocalyx</i> var. <i>laxiflora</i>   | Yunnan Prov.                      | 99      |
| 501 | Neolaxiflorin E           | <i>I. eriocalyx</i> var. <i>laxiflora</i>   | Yunnan Prov.                      | 99      |
| 502 | Laxiflorin U              | <i>I. eriocalyx</i> var. <i>laxiflora</i>   | Yunnan Prov.                      | 98      |
| 503 | Isorosthin A              | <i>I. rosthornii</i>                        | Qionglai, Sichuan Prov.           | 111     |
| 504 | Laxiflorol A              | <i>I. eriocalyx</i> var. <i>laxiflora</i>   | Yunnan Prov.                      | 118     |
| 505 | Kaurine A                 | <i>I. rubescens</i>                         | Jianshi, Hubei Prov.              | 173     |
| 506 | Kaurine B                 | <i>I. rubescens</i>                         | Jianshi, Hubei Prov.              | 173     |
| 507 | Kaurine C                 | <i>I. rubescens</i>                         | Jianshi, Hubei Prov.              | 173     |
| 508 | Alboatisin A              | <i>I. albopilosus</i>                       | Maoxian, Sichuan Prov.            | 174     |
| 509 | Alboatisin B              | <i>I. albopilosus</i>                       | Maoxian, Sichuan Prov.            | 174     |

|     |                                                                   |                                                   |                                   |              |
|-----|-------------------------------------------------------------------|---------------------------------------------------|-----------------------------------|--------------|
| 510 | Alboatisin C                                                      | <i>I. albopilosus</i>                             | Maoxian, Sichuan Prov.            | 174          |
| 511 | Eriocatisin A                                                     | <i>I. eriocalyx</i>                               | Luding, Sichuan Prov.             | 66           |
| 512 | Isorosthornin D                                                   | <i>I. rosthornii</i>                              | Qionglai, Sichuan Prov.           | 119          |
| 513 | Isorubescins E                                                    | <i>I. rubescens</i>                               | Lushi, Henan Prov.                | 146          |
| 514 | Xerophilinoid C                                                   | <i>I. xerophilus</i>                              | Yuanyang, Yunnan Prov.            | 176          |
| 515 | Xerophilusin XIV                                                  | <i>I. xerophilus</i>                              | Yuanyang, Yunnan Prov.            | 177          |
| 516 | Xerophilusin XV                                                   | <i>I. xerophilus</i>                              | Yuanyang, Yunnan Prov.            | 177          |
| 517 | Xerophilusin XVI                                                  | <i>I. xerophilus</i>                              | Yuanyang, Yunnan Prov.            | 177          |
| 518 | Macrophynin E                                                     | <i>I. macrophyllus</i>                            | Zhenjiang, Jiangsu Prov.          | 178          |
| 519 | Macrophynin F                                                     | <i>I. macrophyllus</i>                            | Zhenjiang, Jiangsu Prov.          | 178          |
| 520 | Dayecrystal C                                                     | <i>I. macrophyllus</i>                            | Tongbai, Henan Prov.              | 179          |
| 521 | Rubescanolid A                                                    | <i>I. rubescens</i>                               | Longli, Guizhou Prov.             | 180          |
| 522 | Rubescanolid B                                                    | <i>I. rubescens</i>                               | Longli, Guizhou Prov.             | 180          |
| 523 | Rubescanolid C                                                    | <i>I. rubescens</i>                               | Longli, Guizhou Prov.             | 181          |
| 524 | Rubescanolid D                                                    | <i>I. rubescens</i>                               | Longli, Guizhou Prov.             | 181          |
| 525 | Rubescanolid E                                                    | <i>I. rubescens</i>                               | Longli, Guizhou Prov.             | 181          |
| 526 | ent-abierubescins A                                               | <i>I. rubescens</i>                               | Jianshi, Hubei Prov.              | 71           |
| 527 | ent-abierubescins B                                               | <i>I. rubescens</i>                               | Jianshi, Hubei Prov.              | 71           |
| 528 | ent-abierubescins C                                               | <i>I. rubescens</i>                               | Jianshi, Hubei Prov.              | 71           |
| 529 | ent-abierubescins D                                               | <i>I. rubescens</i>                               | Jianshi, Hubei Prov.              | 71           |
| 530 | ent-abierubescins E                                               | <i>I. rubescens</i>                               | Jianshi, Hubei Prov.              | 71           |
| 531 | Hebeiabinin A                                                     | <i>I. rubescens</i> var. <i>rubescens</i>         | Hebei Prov.                       | 182          |
| 532 | Hebeiabinin B                                                     | <i>I. rubescens</i> var. <i>rubescens</i>         | Hebei Prov.                       | 182          |
| 533 | Hebeiabinin C                                                     | <i>I. rubescens</i> var. <i>rubescens</i>         | Hebei Prov.                       | 182          |
| 534 | Hebeiabinin D                                                     | <i>I. rubescens</i> var. <i>rubescens</i>         | Hebei Prov.                       | 182          |
| 535 | Hebeiabinin E                                                     | <i>I. rubescens</i> var. <i>rubescens</i>         | Hebei Prov.                       | 182          |
| 536 | Inflexanin A                                                      | <i>I. inflexus</i>                                | Yantai, Shandong Prov.            | 184          |
| 537 | Inflexanin B                                                      | <i>I. inflexus</i>                                | Yantai, Shandong Prov.            | 184          |
| 538 | Inflexanin C                                                      | <i>I. inflexus</i>                                | Yantai, Shandong Prov.            | 184          |
| 539 | Inflexanin D                                                      | <i>I. inflexus</i>                                | Yantai, Shandong Prov.            | 184          |
| 540 | 3 $\alpha$ ,6 $\beta$ -dihydroxy-7,17-dioxo-ent-abieta-15(16)-ene | <i>I. inflexus</i>                                | Cultivated, Chungbuk University   | National 185 |
| 541 | Laxiflorin P                                                      | <i>I. eriocalyx</i> var. <i>laxiflora</i>         | Yunnan Prov.                      | 117          |
| 542 | Laxiflorin Q                                                      | <i>I. eriocalyx</i> var. <i>laxiflora</i>         | Yunnan Prov.                      | 117          |
| 543 | Laxiflorin V                                                      | <i>I. eriocalyx</i> var. <i>laxiflora</i>         | Yunnan Prov.                      | 98           |
| 544 | Eriocasin B                                                       | <i>I. eriocalyx</i>                               | Luding, Sichuan Prov.             | 66           |
| 545 | Eriocasin C                                                       | <i>I. eriocalyx</i>                               | Luding, Sichuan Prov.             | 66           |
| 546 | Eriocasin D                                                       | <i>I. eriocalyx</i>                               | Luding, Sichuan Prov.             | 66           |
| 547 | 3-acetyleriocasin C                                               | <i>I. eriocalyx</i>                               | Luding, Sichuan Prov.             | 66           |
| 548 | 3 $\beta$ -acetoxyeriocasin D                                     | <i>I. eriocalyx</i>                               | Luding, Sichuan Prov.             | 66           |
| 549 | Eriocasin E                                                       | <i>I. eriocalyx</i>                               | Luding, Sichuan Prov.             | 66           |
| 550 | Gerardianin A                                                     | <i>I. lophanthoides</i> var. <i>gerardianus</i>   | Guangzhou, Guangdong Prov.        | 187          |
| 551 | rabdosin D                                                        | <i>I. lophanthoides</i> var. <i>gerardianus</i>   | Guangzhou, Guangdong Prov.        | 188          |
| 552 | (+)-15-hydroxysalvinolone                                         | <i>I. lophanthoides</i> var. <i>gerardianus</i>   | Guangzhou, Guangdong Prov.        | 188          |
| 553 | rabdosiacoside A                                                  | <i>I. lophanthoides</i> var. <i>gerardianus</i>   | Guangzhou, Guangdong Prov.        | 188          |
| 554 | Isolophanthin A                                                   | <i>I. lophanthoides</i> var. <i>gerardianus</i>   | Zhejiang Prov.                    | 189          |
| 555 | Isolophanthin B                                                   | <i>I. lophanthoides</i> var. <i>gerardianus</i>   | Zhejiang Prov.                    | 189          |
| 556 | Isolophanthin D                                                   | <i>I. lophanthoides</i> var. <i>gerardianus</i>   | Zhejiang Prov.                    | 189          |
| 557 | Gerardianin B                                                     | <i>I. lophanthoides</i> var. <i>gerardianus</i>   | Qingyuan, Guangdong Prov.         | 190          |
| 558 | Gerardianin C                                                     | <i>I. lophanthoides</i> var. <i>gerardianus</i>   | Qingyuan, Guangdong Prov.         | 190          |
| 559 | 11,12-dihydroxyabieta-7-oxo-8,11,13-trien-15-ol                   | <i>I. lophanthoides</i> var. <i>gerardianus</i>   | Wanshoulu Chinese medicine market | 191          |
| 560 | 16-acetoxyisugiol                                                 | <i>I. lophanthoides</i> var. <i>graciliflorus</i> | Qingyuan, Guangdong Prov.         | 192          |
| 561 | Graciliflorin E                                                   | <i>I. lophanthoides</i> var. <i>graciliflorus</i> | Qingyuan, Guangdong Prov.         | 192          |
| 562 | Graciliflorin F                                                   | <i>I. lophanthoides</i> var. <i>graciliflorus</i> | Qingyuan, Guangdong Prov.         | 192          |
| 563 | 15-O-methylgraciliflorin F                                        | <i>I. lophanthoides</i> var. <i>graciliflorus</i> | Qingyuan, Guangdong Prov.         | 192          |
| 564 | 15-hydroxy-20-deoxocarnosol                                       | <i>I. lophanthoides</i> var. <i>graciliflorus</i> | Qingyuan, Guangdong Prov.         | 192          |

|     |                                                                                   |                                                   |                                |     |
|-----|-----------------------------------------------------------------------------------|---------------------------------------------------|--------------------------------|-----|
| 565 | 15-hydroxy-1-oxosalvibretol                                                       | <i>I. lophanthoides</i> var. <i>graciliflorus</i> | Qingyuan, Guangdong Prov.      | 192 |
| 566 | Graciliflorin D                                                                   | <i>I. lophanthoides</i> var. <i>graciliflorus</i> | Qingyuan, Guangdong Prov.      | 193 |
| 567 | Sincoetsin A                                                                      | <i>I. coetsa</i>                                  | Singapore                      | 194 |
| 568 | Sincoetsin B                                                                      | <i>I. coetsa</i>                                  | Singapore                      | 194 |
| 569 | Parvifoline L                                                                     | <i>I. parvifolia</i>                              | Maoxian, Sichuan Prov.         | 195 |
| 570 | Parvifoline M                                                                     | <i>I. parvifolia</i>                              | Maoxian, Sichuan Prov.         | 195 |
| 571 | Parvifoline N                                                                     | <i>I. parvifolia</i>                              | Maoxian, Sichuan Prov.         | 195 |
| 572 | <i>ent</i> -abienergonin A                                                        | <i>I. nervosus</i>                                | Xichang, Sichuan Prov.         | 196 |
| 573 | <i>ent</i> -abienergonin B                                                        | <i>I. nervosus</i>                                | Xichang, Sichuan Prov.         | 196 |
| 574 | <i>ent</i> -abienergonin C                                                        | <i>I. nervosus</i>                                | Xichang, Sichuan Prov.         | 196 |
| 575 | Isoadenolin M                                                                     | <i>I. adenolomus</i>                              | Shangri-La, Yunnan Prov.       | 69  |
| 576 | Isoabietenin A                                                                    | <i>I. tenuifolius</i>                             | Shangri-La, Yunnan Prov.       | 75  |
| 577 | Isoabietenin B                                                                    | <i>I. tenuifolius</i>                             | Shangri-La, Yunnan Prov.       | 75  |
| 578 | Isoabietenin C                                                                    | <i>I. tenuifolius</i>                             | Shangri-La, Yunnan Prov.       | 75  |
| 579 | Pharicinin A                                                                      | <i>I. pharicus</i>                                | Lhasa, Tibet Autonomous region | 57  |
| 580 | Graciliflorin C                                                                   | <i>I. lophanthoides</i> var. <i>graciliflorus</i> | Qingyuan, Guangdong Prov.      | 193 |
| 581 | <i>ent</i> -isopimanervoside A                                                    | <i>I. lophanthoides</i> var. <i>gerardianus</i>   | Xichang, Sichuan Prov.         | 196 |
| 582 | <i>ent</i> -isopimanervoside B                                                    | <i>I. lophanthoides</i> var. <i>gerardianus</i>   | Xichang, Sichuan Prov.         | 196 |
| 583 | Isolophanthin C                                                                   | <i>I. lophanthoides</i> var. <i>gerardianus</i>   | Zhejiang Prov.                 | 189 |
| 584 | Graciliflorin A                                                                   | <i>I. lophanthoides</i> var. <i>graciliflorus</i> | Qingyuan, Guangdong Prov.      | 193 |
| 585 | Graciliflorin B                                                                   | <i>I. lophanthoides</i> var. <i>graciliflorus</i> | Qingyuan, Guangdong Prov.      | 193 |
| 586 | 3 $\beta$ -hydroxysempervirool                                                    | <i>I. lophanthoides</i> var. <i>graciliflorus</i> | Qingyuan, Guangdong Prov.      | 192 |
| 587 | Hispidanol A                                                                      | <i>I. hispida</i>                                 | Dali, Yunnan Prov.             | 198 |
| 588 | Hispidanol B                                                                      | <i>I. hispida</i>                                 | Dali, Yunnan Prov.             | 198 |
| 589 | totara-8,11,13-triene-13 $\rightarrow$ 16-hemiacetal                              | <i>I. hispida</i>                                 | Dali, Yunnan Prov.             | 198 |
| 590 | S-trans-8(17),12E,14-labdatrien-20-oic acid                                       | <i>I. yuennanensis</i>                            | Dali, Yunnan Prov.             | 199 |
| 591 | S-trans-12E,14-labdadien-20,8 $\beta$ -olide                                      | <i>I. yuennanensis</i>                            | Dali, Yunnan Prov.             | 199 |
| 592 | 14 $\beta$ -Hydroxy-8(17),12-labdadien-(15 $\rightarrow$ 16)-lactone-19-oic acid  | <i>I. adenantha</i>                               | Dali, Yunnan Prov.             | 74  |
| 593 | 13E,14 $\beta$ -Dihydroxy-8(17)-labdaen-(15 $\rightarrow$ 16)-lactone-19-oic acid | <i>I. adenantha</i>                               | Dali, Yunnan Prov.             | 74  |
| 594 | Adenanthic acid A                                                                 | <i>I. adenantha</i>                               | Dali, Yunnan Prov.             | 200 |
| 595 | Adenanthic acid B                                                                 | <i>I. adenantha</i>                               | Dali, Yunnan Prov.             | 200 |
| 596 | Adenanthoside A                                                                   | <i>I. adenantha</i>                               | Dali, Yunnan Prov.             | 200 |
| 597 | Adenanthoside B                                                                   | <i>I. adenantha</i>                               | Dali, Yunnan Prov.             | 200 |
| 598 | Adenanthoside C                                                                   | <i>I. adenantha</i>                               | Dali, Yunnan Prov.             | 200 |
| 599 | Isoscoparin O                                                                     | <i>I. scoparius</i>                               | Shangri-La, Yunnan Prov.       | 201 |
| 600 | Isoscoparin P                                                                     | <i>I. scoparius</i>                               | Shangri-La, Yunnan Prov.       | 202 |
| 601 | Isoscoparin Q                                                                     | <i>I. scoparius</i>                               | Shangri-La, Yunnan Prov.       | 203 |
| 602 | Scopariusin A                                                                     | <i>I. scoparius</i>                               | Shangri-La, Yunnan Prov.       | 201 |
| 603 | Scopariusin B                                                                     | <i>I. scoparius</i>                               | Shangri-La, Yunnan Prov.       | 201 |
| 604 | Scopariusin C                                                                     | <i>I. scoparius</i>                               | Shangri-La, Yunnan Prov.       | 201 |
| 605 | Isoscoparin M                                                                     | <i>I. scoparius</i>                               | Shangri-La, Yunnan Prov.       | 201 |
| 606 | Isoscoparin N                                                                     | <i>I. scoparius</i>                               | Shangri-La, Yunnan Prov.       | 201 |
| 607 | Scopariusic acid                                                                  | <i>I. scoparius</i>                               | Shangri-La, Yunnan Prov.       | 202 |
| 608 | Scopariusicide A                                                                  | <i>I. scoparius</i>                               | Shangri-La, Yunnan Prov.       | 203 |
| 609 | Scopariusicide B                                                                  | <i>I. scoparius</i>                               | Shangri-La, Yunnan Prov.       | 203 |

**Table S2:** Cytotoxic activity of *ent*-kauranoids from *Isodon* species.

| Compounds                           | Tumor cell line | Activity                   | Ref.  |
|-------------------------------------|-----------------|----------------------------|-------|
| Albopilosin H (8)                   | HepG2           | 13.31 $\mu$ M              | 40    |
| Phyllostachysin D (11)              | K562            | 2.92 $\mu$ g/mL            | 41    |
| Phyllostachysin E (12)              | K562            | > 200 $\mu$ g/mL           | 41    |
| Phyllostachysin F (13)              | K562            | 1.15 $\mu$ g/mL            | 41    |
| Phyllostachysin G (14)              | K562            | 4.58 $\mu$ g/mL            | 41    |
| Phyllostachysin H (15)              | K562            | 6.71 $\mu$ g/mL            | 41    |
| Parvifoline Z (16)                  | A549            | 1.89 $\pm$ 0.23 $\mu$ M    | 42    |
|                                     | HT-29           | 2.45 $\pm$ 0.11 $\mu$ M    |       |
|                                     | K562            | 1.24 $\pm$ 0.12 $\mu$ M    |       |
| Racemosin A (17)                    | Bel-7402        | 1.56 $\pm$ 1.17 $\mu$ g/mL | 44    |
|                                     | HO-8910         | 3.72 $\pm$ 2.55 $\mu$ g/mL |       |
| Glaucoalyxin F (24)                 | A549            | 3.31 $\mu$ g/mL            | 48/49 |
|                                     | LOVO            | 1.73 $\mu$ g/mL            |       |
|                                     | HL-60           | 3.16 $\mu$ g/mL            |       |
|                                     | 6T-CEM          | 1.57 $\mu$ g/mL            |       |
| Glaucoalyxin X (25)                 | A549            | > 100 $\mu$ g/mL           | 48/49 |
|                                     | LOVO            | > 100 $\mu$ g/mL           |       |
|                                     | HL-60           | > 100 $\mu$ g/mL           |       |
|                                     | 6T-CEM          | > 100 $\mu$ g/mL           |       |
| Nervonin B (28)                     | K562            | 1.18 $\mu$ M               | 56    |
|                                     | A549            | 1.53 $\mu$ M               |       |
|                                     | HepG2           | 1.16 $\mu$ M               |       |
| Pharicinin B (37)                   | NB4             | 3.0 $\mu$ M                | 57    |
|                                     | A549            | > 10 $\mu$ M               |       |
|                                     | SH-SY5Y         | 8.1 $\mu$ M                |       |
|                                     | PC-3            | >10 $\mu$ M                |       |
|                                     | MCF-7           | 4.4 $\mu$ M                |       |
| Pharicinin C (38)                   | NB4             | 2.3 $\mu$ M                | 57    |
|                                     | A549            | > 10 $\mu$ M               |       |
|                                     | SH-SY5Y         | 5.3 $\mu$ M                |       |
|                                     | PC-3            | > 10 $\mu$ M               |       |
|                                     | MCF-7           | > 10 $\mu$ M               |       |
| 12- <i>O</i> -acetylpsaurata B (45) | NB4             | 8.32 $\mu$ M               | 60    |
|                                     | A549            | > 10 $\mu$ M               |       |
|                                     | SH-SY5Y         | 8.12 $\mu$ M               |       |
|                                     | PC-3            | > 10 $\mu$ M               |       |
|                                     | MCF-7           | > 10 $\mu$ M               |       |
| 17-Methoxydihydropseurata C (52)    | NB4             | 8.74 $\mu$ M               | 60    |
|                                     | A549            | > 10 $\mu$ M               |       |
|                                     | SH-SY5Y         | > 10 $\mu$ M               |       |
|                                     | PC-3            | 7.42 $\mu$ M               |       |
|                                     | MCF-7           | > 10 $\mu$ M               |       |
| Pseurata B acetonide (53)           | NB4             | 3.56 $\mu$ M               | 60    |
|                                     | A549            | 6.02 $\mu$ M               |       |
|                                     | SH-SY5Y         | > 10 $\mu$ M               |       |
|                                     | PC-3            | > 10 $\mu$ M               |       |
|                                     | MCF-7           | > 10 $\mu$ M               |       |
| Isoscoparin F (59)                  | NB4             | 2.2 $\mu$ M                | 64    |
|                                     | A549            | 9.9 $\mu$ M                |       |
|                                     | SH-SY5Y         | 9.2 $\mu$ M                |       |
|                                     | PC-3            | > 10 $\mu$ M               |       |
|                                     | MCF-7           | 3.9 $\mu$ M                |       |
| Isoscoparin I (62)                  | NB4             | 4.4 $\mu$ M                | 64    |
|                                     | A549            | > 10 $\mu$ M               |       |
|                                     | SH-SY5Y         | > 10 $\mu$ M               |       |

|                                                                                                              |           |                                   |    |
|--------------------------------------------------------------------------------------------------------------|-----------|-----------------------------------|----|
|                                                                                                              | PC-3      | > 10 $\mu\text{M}$                |    |
|                                                                                                              | MCF-7     | > 10 $\mu\text{M}$                |    |
| Isoscoparin L (65)                                                                                           | NB4       | 0.7 $\mu\text{M}$                 | 64 |
|                                                                                                              | A549      | 6.4 $\mu\text{M}$                 |    |
|                                                                                                              | SH-SY5Y   | 6.8 $\mu\text{M}$                 |    |
|                                                                                                              | PC-3      | > 10 $\mu\text{M}$                |    |
|                                                                                                              | MCF-7     | 2.2 $\mu\text{M}$                 |    |
| Minheryin C (68)                                                                                             | K562      | 80.15 $\pm$ 2.33 $\mu\text{g/mL}$ | 55 |
| Minheryin G (72)                                                                                             | K562      | 0.43 $\pm$ 0.00 $\mu\text{g/mL}$  | 55 |
|                                                                                                              | HepG2     | 0.32 $\mu\text{g/mL}$             |    |
| Maoesin E (76)                                                                                               | HT-29     | > 10 $\mu\text{M}$                | 66 |
|                                                                                                              | Bel-7402  | > 10 $\mu\text{M}$                |    |
|                                                                                                              | SK-OV-3   | > 10 $\mu\text{M}$                |    |
| Pharicin D (77)                                                                                              | NB4       | > 50 $\mu\text{M}$                | 58 |
|                                                                                                              | A549      | > 50 $\mu\text{M}$                |    |
|                                                                                                              | SH-SY5Y   | > 50 $\mu\text{M}$                |    |
|                                                                                                              | PC-3      | > 50 $\mu\text{M}$                |    |
|                                                                                                              | MCF-7     | > 50 $\mu\text{M}$                |    |
| Pharicin E (78)                                                                                              | NB4       | > 50 $\mu\text{M}$                | 58 |
|                                                                                                              | A549      | > 50 $\mu\text{M}$                |    |
|                                                                                                              | SH-SY5Y   | > 50 $\mu\text{M}$                |    |
|                                                                                                              | PC-3      | 26.87 $\mu\text{M}$               |    |
|                                                                                                              | MCF-7     | > 50 $\mu\text{M}$                |    |
| Pharicin D acetal (79)                                                                                       | NB4       | 10.82 $\mu\text{M}$               | 58 |
|                                                                                                              | A549      | > 50 $\mu\text{M}$                |    |
|                                                                                                              | SH-SY5Y   | > 50 $\mu\text{M}$                |    |
|                                                                                                              | PC-3      | 24.90 $\mu\text{M}$               |    |
|                                                                                                              | MCF-7     | 47.99 $\mu\text{M}$               |    |
| Isoleuconin A (80)                                                                                           | SK-OV-3   | > 100 $\mu\text{M}$               | 68 |
|                                                                                                              | Bel-7402  | > 100 $\mu\text{M}$               |    |
|                                                                                                              | HT-29     | > 100 $\mu\text{M}$               |    |
| Isoleuconin B (81)                                                                                           | SK-OV-3   | > 100 $\mu\text{M}$               | 68 |
|                                                                                                              | Bel-7402  | > 100 $\mu\text{M}$               |    |
|                                                                                                              | HT-29     | > 100 $\mu\text{M}$               |    |
| Isoleuconin C (82)                                                                                           | SK-OV-3   | 38.0 $\mu\text{M}$                | 68 |
|                                                                                                              | Bel-7402  | 40.8 $\mu\text{M}$                |    |
|                                                                                                              | HT-29     | 82.8 $\mu\text{M}$                |    |
| Isoadenolin N (83)                                                                                           | HL-60     | 16.2 $\mu\text{M}$                | 69 |
|                                                                                                              | SMMC-7721 | 19.1 $\mu\text{M}$                |    |
|                                                                                                              | A-549     | > 40 $\mu\text{M}$                |    |
|                                                                                                              | MCF-7     | 15.2 $\mu\text{M}$                |    |
|                                                                                                              | SW480     | 14.8 $\mu\text{M}$                |    |
| Isoadenolin O (84)                                                                                           | HL-60     | 6.8 $\mu\text{M}$                 | 69 |
|                                                                                                              | SMMC-7721 | 5.5 $\mu\text{M}$                 |    |
|                                                                                                              | A-549     | > 40 $\mu\text{M}$                |    |
|                                                                                                              | MCF-7     | 12.2 $\mu\text{M}$                |    |
|                                                                                                              | SW480     | 12.8 $\mu\text{M}$                |    |
| 7 $\alpha$ ,12 $\alpha$ ,14 $\beta$ -Trihydroxy-3 $\beta$ -acetoxy- <i>ent</i> -kaur-16-en-15-oxo-19-al (89) | NB4       | 15.42 $\mu\text{M}$               | 61 |
|                                                                                                              | A549      | 18.37 $\mu\text{M}$               |    |
|                                                                                                              | SH-SY5Y   | 18.33 $\mu\text{M}$               |    |
|                                                                                                              | PC-3      | > 50 $\mu\text{M}$                |    |
|                                                                                                              | MCF-7     | 42.51 $\mu\text{M}$               |    |
| Pharicin F acetonide (93)                                                                                    | NB4       | 8.67 $\mu\text{M}$                | 61 |
|                                                                                                              | A549      | 12.04 $\mu\text{M}$               |    |
|                                                                                                              | SH-SY5Y   | > 50 $\mu\text{M}$                |    |
|                                                                                                              | PC-3      | 32.01 $\mu\text{M}$               |    |
|                                                                                                              | MCF-7     | 43.60 $\mu\text{M}$               |    |

|                         |                         |                   |         |    |    |
|-------------------------|-------------------------|-------------------|---------|----|----|
| Glaucocalyxin H (96)    | CE-1                    | 3.17 ± 0.16 μM    | 50/51   |    |    |
|                         | U87                     | 3.65 ± 0.21 μM    |         |    |    |
|                         | A-549                   | 238.76 ± 10.66 μM |         |    |    |
|                         | MCF-7                   | 10.95 ± 1.04 μM   |         |    |    |
|                         | Hela                    | 3.64 ± 0.31 μM    |         |    |    |
|                         | K562                    | 1.86 ± 0.04 μM    |         |    |    |
|                         | HepG2                   | 1.97 ± 0.05 μM    |         |    |    |
|                         | HL-60                   | > 10 μM           |         | 73 |    |
| Wikstroemioidin E (104) | SMMC-7721               | > 10 μM           |         |    |    |
|                         | A-549                   | > 10 μM           |         |    |    |
|                         | MCF-7                   | > 10 μM           |         |    |    |
|                         | SW-480                  | 6.9 μM            |         |    |    |
|                         | Wikstroemioidin F (105) | HL-60             | > 10 μM |    | 73 |
|                         |                         | SMMC-7721         | > 10 μM |    |    |
|                         |                         | A-549             | > 10 μM |    |    |
|                         |                         | MCF-7             | > 10 μM |    |    |
| SW-480                  |                         | 8.6 μM            |         |    |    |
| Wikstroemioidin G (106) |                         | HL-60             | 2.9 μM  | 73 |    |
|                         |                         | SMMC-7721         | 3.5 μM  |    |    |
|                         |                         | A-549             | 2.7 μM  |    |    |
|                         | MCF-7                   | 1.6 μM            |         |    |    |
|                         | SW-480                  | 0.9 μM            |         |    |    |
|                         | Wikstroemioidin H (107) | HL-60             | 3.6 μM  |    | 73 |
|                         |                         | SMMC-7721         | 4.0 μM  |    |    |
|                         |                         | A-549             | 4.4 μM  |    |    |
| MCF-7                   |                         | 4.9 μM            |         |    |    |
| SW-480                  |                         | 1.4 μM            |         |    |    |
| Wikstroemioidin M (112) |                         | HL-60             | 4.1 μM  | 73 |    |
|                         |                         | SMMC-7721         | 4.1 μM  |    |    |
|                         |                         | A-549             | 3.7 μM  |    |    |
|                         | MCF-7                   | 4.8 μM            |         |    |    |
|                         | SW-480                  | 2.7 μM            |         |    |    |
|                         | Wikstroemioidin O (114) | HL-60             | 4.8 μM  |    | 73 |
|                         |                         | SMMC-7721         | 5.1 μM  |    |    |
|                         |                         | A-549             | 5.1 μM  |    |    |
| MCF-7                   |                         | 3.7 μM            |         |    |    |
| SW-480                  |                         | 2.3 μM            |         |    |    |
| Wikstroemioidin P (115) |                         | HL-60             | 3.1 μM  | 73 |    |
|                         |                         | SMMC-7721         | 0.8 μM  |    |    |
|                         |                         | A-549             | 1.0 μM  |    |    |
|                         | MCF-7                   | 1.6 μM            |         |    |    |
|                         | SW-480                  | 1.0 μM            |         |    |    |
|                         | Wikstroemioidin Q (116) | HL-60             | 3.2 μM  |    | 73 |
|                         |                         | SMMC-7721         | 1.4 μM  |    |    |
|                         |                         | A-549             | 0.9 μM  |    |    |
| MCF-7                   |                         | 1.7 μM            |         |    |    |
| SW-480                  |                         | 1.0 μM            |         |    |    |
| Tenuifolin A (122)      |                         | HL-60             | 4.7 μM  | 75 |    |
|                         |                         | SMMC-7721         | 7.4 μM  |    |    |
|                         |                         | A-549             | > 10 μM |    |    |
|                         | MCF-7                   | > 10 μM           |         |    |    |
|                         | SW-480                  | > 10 μM           |         |    |    |
|                         | Tenuifolin I (130)      | HL-60             | 0.8 μM  |    | 75 |
|                         |                         | SMMC-7721         | 1.9 μM  |    |    |
|                         |                         | A-549             | 4.5 μM  |    |    |
| MCF-7                   |                         | 3.0 μM            |         |    |    |
| SW-480                  |                         | 4.3 μM            |         |    |    |

|                                       |           |                       |    |
|---------------------------------------|-----------|-----------------------|----|
| Tenuifolin J (131)                    | HL-60     | 3.8 $\mu\text{M}$     | 75 |
|                                       | SMMC-7721 | 6.3 $\mu\text{M}$     |    |
|                                       | A-549     | > 10 $\mu\text{M}$    |    |
|                                       | MCF-7     | > 10 $\mu\text{M}$    |    |
|                                       | SW-480    | > 10 $\mu\text{M}$    |    |
| Tenuifolin M (134)                    | HL-60     | 4.4 $\mu\text{M}$     | 75 |
|                                       | SMMC-7721 | > 10 $\mu\text{M}$    |    |
|                                       | A-549     | > 10 $\mu\text{M}$    |    |
|                                       | MCF-7     | > 10 $\mu\text{M}$    |    |
|                                       | SW-480    | > 10 $\mu\text{M}$    |    |
| Maoesin D (140)                       | HT-29     | 7.3 $\mu\text{M}$     | 66 |
|                                       | Bel-7402  | > 10 $\mu\text{M}$    |    |
|                                       | SK-OV-3   | > 10 $\mu\text{M}$    |    |
| Parvifoline C (143)                   | K562      | 13.8 $\mu\text{M}$    | 80 |
| Parvifoline Q (154)                   | A549      | 8.65 $\mu\text{M}$    | 81 |
|                                       | HT-29     | 14.02 $\mu\text{M}$   |    |
|                                       | K562      | 5.57 $\mu\text{M}$    |    |
| Parvifoline U (158)                   | A549      | 7.45 $\mu\text{M}$    | 81 |
|                                       | HT-29     | 10.54 $\mu\text{M}$   |    |
|                                       | K562      | 2.64 $\mu\text{M}$    |    |
| Parvifoline V (159)                   | A549      | 6.53 $\mu\text{M}$    | 81 |
|                                       | HT-29     | 10.91 $\mu\text{M}$   |    |
|                                       | K562      | 5.26 $\mu\text{M}$    |    |
| Hebeirubescensin A (161)              | A549      | 4.80 $\mu\text{M}$    | 82 |
|                                       | HT-29     | 16.57 $\mu\text{M}$   |    |
|                                       | K562      | 5.93 $\mu\text{M}$    |    |
| Hebeirubescensin B (162)              | A549      | 0.68 $\mu\text{M}$    | 82 |
|                                       | HT-29     | 1.19 $\mu\text{M}$    |    |
|                                       | K562      | 1.21 $\mu\text{M}$    |    |
| Hebeirubescensin C (163)              | A549      | 1.17 $\mu\text{M}$    | 82 |
|                                       | HT-29     | 1.93 $\mu\text{M}$    |    |
|                                       | K562      | 1.88 $\mu\text{M}$    |    |
| Hebeirubescensin D (164)              | A549      | 5.32 $\mu\text{M}$    | 82 |
|                                       | HT-29     | 6.04 $\mu\text{M}$    |    |
|                                       | K562      | 7.31 $\mu\text{M}$    |    |
| Hebeirubescensin E (165)              | A549      | 1.67 $\mu\text{M}$    | 82 |
|                                       | HT-29     | 2.84 $\mu\text{M}$    |    |
|                                       | K562      | 6.17 $\mu\text{M}$    |    |
| Hebeirubescensin F (166)              | A549      | > 100 $\mu\text{M}$   | 82 |
|                                       | HT-29     | > 100 $\mu\text{M}$   |    |
|                                       | K562      | > 100 $\mu\text{M}$   |    |
| Hebeirubescensins G (167) and H (168) | A549      | 8.99 $\mu\text{M}$    | 82 |
|                                       | HT-29     | 18.42 $\mu\text{M}$   |    |
|                                       | K562      | 8.32 $\mu\text{M}$    |    |
| Hebeirubescensin I (169)              | A549      | > 100 $\mu\text{M}$   | 82 |
|                                       | HT-29     | > 100 $\mu\text{M}$   |    |
|                                       | K562      | > 100 $\mu\text{M}$   |    |
| Hebeirubescensin J (170)              | A549      | > 100 $\mu\text{M}$   | 82 |
|                                       | HT-29     | > 100 $\mu\text{M}$   |    |
|                                       | K562      | > 100 $\mu\text{M}$   |    |
| Hebeirubescensin K (171)              | A549      | > 100 $\mu\text{M}$   | 82 |
|                                       | HT-29     | > 100 $\mu\text{M}$   |    |
|                                       | K562      | > 100 $\mu\text{M}$   |    |
| Hebeirubescensin L (172)              | A549      | > 100 $\mu\text{M}$   | 82 |
|                                       | HT-29     | > 100 $\mu\text{M}$   |    |
|                                       | K562      | > 100 $\mu\text{M}$   |    |
| Jiyuanoridonin A (175)                | EC109     | 4.52 $\mu\text{g/ml}$ | 84 |



|                                                                                                                             |           |                          |       |
|-----------------------------------------------------------------------------------------------------------------------------|-----------|--------------------------|-------|
| Xerophilusin III (176)                                                                                                      | K562      | 0.04 $\mu$ M             | 85    |
|                                                                                                                             | MKN45     | 2.8 $\mu$ M              |       |
|                                                                                                                             | HepG2     | 0.19 $\mu$ M             |       |
| Xerophilusin IV (177)                                                                                                       | K562      | 1.0 $\mu$ M              | 85    |
|                                                                                                                             | MKN45     | > 10 $\mu$ M             |       |
|                                                                                                                             | HepG2     | 4.5 $\mu$ M              |       |
| Xerophilusin XI (184)                                                                                                       | K562      | 1.5 $\mu$ M              | 85    |
|                                                                                                                             | MKN45     | 3.9 $\mu$ M              |       |
|                                                                                                                             | HepG2     | 1.9 $\mu$ M              |       |
| Xerophilusin XIII (186)                                                                                                     | K562      | 3.6 $\mu$ M              | 85    |
|                                                                                                                             | MKN45     | 2.1 $\mu$ M              |       |
|                                                                                                                             | HepG2     | 4.9 $\mu$ M              |       |
| Xerophinoid B (187)                                                                                                         | K562      | 0.32 $\pm$ 0.13 $\mu$ M  | 86    |
|                                                                                                                             | NB4       | 3.73 $\pm$ 0.67 $\mu$ M  |       |
|                                                                                                                             | NB4-R2    | 3.06 $\pm$ 0.90 $\mu$ M  |       |
|                                                                                                                             | T24       | 45.98 $\pm$ 2.31 $\mu$ M |       |
|                                                                                                                             | Me180     | 3.46 $\pm$ 0.46 $\mu$ M  |       |
|                                                                                                                             | BIU87     | 32.22 $\pm$ 3.16 $\mu$ M |       |
|                                                                                                                             | QGY-7202  | 27.06 $\pm$ 2.59 $\mu$ M |       |
|                                                                                                                             | 32D       | 3.99 $\pm$ 0.91 $\mu$ M  |       |
|                                                                                                                             | C8166     | > 25 $\mu$ M             |       |
|                                                                                                                             |           |                          |       |
| Phyllostacin C (188)                                                                                                        | K562      | > 100 $\mu$ M            | 87    |
|                                                                                                                             | HL-60     | > 100 $\mu$ M            |       |
|                                                                                                                             | HepG2     | > 100 $\mu$ M            |       |
| Phyllostacin D (189)                                                                                                        | K562      | > 100 $\mu$ M            | 87    |
|                                                                                                                             | HL-60     | > 100 $\mu$ M            |       |
|                                                                                                                             | HepG2     | > 100 $\mu$ M            |       |
| 6 $\beta$ ,7 $\beta$ ,13 $\alpha$ -trihydroxy-1 $\alpha$ -acetoxy-7 $\alpha$ ,20-epoxy- <i>ent</i> -kaur-16-en-15-one (202) | HL-60     | 24.93 $\pm$ 4.13 $\mu$ M | 93/94 |
|                                                                                                                             | SMMC-7721 | 45.18 $\pm$ 3.04 $\mu$ M |       |
|                                                                                                                             | Hela      | 89.12 $\pm$ 3.97 $\mu$ M |       |
| Neolaxiflorin K (208)                                                                                                       | HL-60     | 10.61 $\mu$ M            | 100   |
|                                                                                                                             | SMMC-7721 | 3.19 $\mu$ M             |       |
|                                                                                                                             | A-549     | 12.93 $\mu$ M            |       |
|                                                                                                                             | MCF-7     | 12.67 $\mu$ M            |       |
|                                                                                                                             | SW480     | 2.08 $\mu$ M             |       |
| Neolaxiflorin L (209)                                                                                                       | HL-60     | 1.82 $\mu$ M             | 100   |
|                                                                                                                             | SMMC-7721 | 2.36 $\mu$ M             |       |
|                                                                                                                             | A-549     | 2.21 $\mu$ M             |       |
|                                                                                                                             | MCF-7     | 2.93 $\mu$ M             |       |
|                                                                                                                             | SW480     | 1.95 $\mu$ M             |       |
| Neolaxiflorin M (210)                                                                                                       | HL-60     | 3.77 $\mu$ M             | 100   |
|                                                                                                                             | SMMC-7721 | 2.44 $\mu$ M             |       |
|                                                                                                                             | A-549     | 3.08 $\mu$ M             |       |
|                                                                                                                             | MCF-7     | 2.64 $\mu$ M             |       |
|                                                                                                                             | SW480     | 1.50 $\mu$ M             |       |
| Neolaxiflorin P (213)                                                                                                       | HL-60     | 0.95 $\mu$ M             | 100   |
|                                                                                                                             | SMMC-7721 | 0.69 $\mu$ M             |       |
|                                                                                                                             | A-549     | 1.12 $\mu$ M             |       |
|                                                                                                                             | MCF-7     | 0.83 $\mu$ M             |       |
|                                                                                                                             | SW480     | 0.45 $\mu$ M             |       |
| Neolaxiflorin Q (214)                                                                                                       | HL-60     | 4.40 $\mu$ M             | 100   |
|                                                                                                                             | SMMC-7721 | 2.99 $\mu$ M             |       |
|                                                                                                                             | A-549     | 3.62 $\mu$ M             |       |
|                                                                                                                             | MCF-7     | 5.25 $\mu$ M             |       |
|                                                                                                                             | SW480     | 1.97 $\mu$ M             |       |
| Neolaxiflorin W (220)                                                                                                       | HL-60     | 20.08 $\mu$ M            | 100   |
|                                                                                                                             | SMMC-7721 | 23.95 $\mu$ M            |       |

|                                                                                                                                 |           |                             |     |
|---------------------------------------------------------------------------------------------------------------------------------|-----------|-----------------------------|-----|
|                                                                                                                                 | A-549     | 22.42 $\mu$ M               |     |
|                                                                                                                                 | MCF-7     | 15.27 $\mu$ M               |     |
|                                                                                                                                 | SW480     | 8.68 $\mu$ M                |     |
| 7 $\beta$ ,12 $\alpha$ -dihydroxy-6 $\beta$ ,15 $\beta$ -diacetoxy-7 $\alpha$ ,20-epoxy- <i>ent</i> -kaur-2,16-dien-1-one (225) | HL-60     | 24.93 $\pm$ 4.13 $\mu$ g/ml | 97  |
|                                                                                                                                 | SMMC-7721 | 45.18 $\pm$ 3.04 $\mu$ g/ml |     |
|                                                                                                                                 | Hela      | 89.12 $\pm$ 3.97 $\mu$ g/ml |     |
| Sculponin Y (227)                                                                                                               | HL-60     | 19.2 $\mu$ M                | 102 |
|                                                                                                                                 | SMMC-7721 | 22.3 $\mu$ M                |     |
|                                                                                                                                 | A-549     | > 40 $\mu$ M                |     |
|                                                                                                                                 | MCF-7     | 16.7 $\mu$ M                |     |
|                                                                                                                                 | SW480     | 19.0 $\mu$ M                |     |
| Sinuolatin A (235)                                                                                                              | NB4       | 1.7 $\mu$ M                 | 103 |
|                                                                                                                                 | A549      | > 10 $\mu$ M                |     |
|                                                                                                                                 | SHSY5Y    | 2.7 $\mu$ M                 |     |
|                                                                                                                                 | PC-3      | > 10 $\mu$ M                |     |
|                                                                                                                                 | MCF-7     | 4.3 $\mu$ M                 |     |
| Sinuolatin B (229)                                                                                                              | NB4       | 3.6 $\mu$ M                 | 103 |
|                                                                                                                                 | A549      | > 10 $\mu$ M                |     |
|                                                                                                                                 | SHSY5Y    | 8.1 $\mu$ M                 |     |
|                                                                                                                                 | PC-3      | > 10 $\mu$ M                |     |
|                                                                                                                                 | MCF-7     | > 10 $\mu$ M                |     |
| Rubluanin D (237)                                                                                                               | U937      | 13.57 $\mu$ M               | 107 |
|                                                                                                                                 | Jurkat    | 13.65 $\mu$ M               |     |
|                                                                                                                                 | HL-60     | 26.69 $\mu$ M               |     |
|                                                                                                                                 | K562      | 20.41 $\mu$ M               |     |
|                                                                                                                                 | SGC790    | > 40 $\mu$ M                |     |
|                                                                                                                                 | HepG2     | > 40 $\mu$ M                |     |
| Isolushinin D (243)                                                                                                             | HL-60     | 1.1 $\mu$ M                 | 108 |
|                                                                                                                                 | SMMC-7721 | 4.7 $\mu$ M                 |     |
|                                                                                                                                 | A-549     | 6.4 $\mu$ M                 |     |
|                                                                                                                                 | SK-BR-3   | 6.4 $\mu$ M                 |     |
|                                                                                                                                 | PANC-1    | 7.0 $\mu$ M                 |     |
| 1 $\alpha$ -acetoxy-14 $\beta$ -hydroxy-7 $\alpha$ ,20-epoxy- <i>ent</i> -kaur-16-en-15-one (246)                               | HCT-116   | 2.13 $\pm$ 0.81 $\mu$ M     | 106 |
|                                                                                                                                 | HepG2     | 2.20 $\pm$ 1.12 $\mu$ M     |     |
|                                                                                                                                 | BGC-823   | > 10 $\mu$ M                |     |
|                                                                                                                                 | NCI-H1650 | 5.68 $\pm$ 0.73 $\mu$ M     |     |
|                                                                                                                                 | A2780     | 1.09 $\pm$ 0.13 $\mu$ M     | 110 |
| Isoadenolin I (253)                                                                                                             | HL-60     | 2.6 $\mu$ M                 |     |
|                                                                                                                                 | SMMC-7721 | 3.0 $\mu$ M                 |     |
|                                                                                                                                 | A-549     | 5.0 $\mu$ M                 |     |
|                                                                                                                                 | MCF-7     | 2.6 $\mu$ M                 |     |
|                                                                                                                                 | SW480     | 3.1 $\mu$ M                 |     |
| Isoadenolin K (255)                                                                                                             | HL-60     | 3.5 $\mu$ M                 | 110 |
|                                                                                                                                 | SMMC-7721 | 5.7 $\mu$ M                 |     |
|                                                                                                                                 | A-549     | 14.1 $\mu$ M                |     |
|                                                                                                                                 | MCF-7     | 3.0 $\mu$ M                 |     |
|                                                                                                                                 | SW480     | 3.1 $\mu$ M                 |     |
| Isorosthin L (257)                                                                                                              | HL-60     | 8.8 $\mu$ M                 | 111 |
|                                                                                                                                 | SMMC-7721 | 3.5 $\mu$ M                 |     |
|                                                                                                                                 | A-549     | 4.6 $\mu$ M                 |     |
|                                                                                                                                 | MCF-7     | 3.3 $\mu$ M                 |     |
|                                                                                                                                 | SW480     | 3.4 $\mu$ M                 |     |
| Isorosthin F (258)                                                                                                              | HL-60     | 4.6 $\mu$ M                 | 111 |
|                                                                                                                                 | SMMC-7721 | > 10 $\mu$ M                |     |
|                                                                                                                                 | A-549     | > 10 $\mu$ M                |     |
|                                                                                                                                 | MCF-7     | > 10 $\mu$ M                |     |
|                                                                                                                                 | SW480     | 3.2 $\mu$ M                 |     |

|                                                                                                                              |           |                               |     |
|------------------------------------------------------------------------------------------------------------------------------|-----------|-------------------------------|-----|
| Isorosthin M (262)                                                                                                           | HL-60     | 5.9 $\mu\text{M}$             | 111 |
|                                                                                                                              | SMMC-7721 | > 10 $\mu\text{M}$            |     |
|                                                                                                                              | A-549     | > 10 $\mu\text{M}$            |     |
|                                                                                                                              | MCF-7     | 8.4 $\mu\text{M}$             |     |
|                                                                                                                              | SW480     | 7.8 $\mu\text{M}$             |     |
| Isorosthin O (264)                                                                                                           | HL-60     | 1.2 $\mu\text{M}$             | 111 |
|                                                                                                                              | SMMC-7721 | 3.2 $\mu\text{M}$             |     |
|                                                                                                                              | A-549     | 3.9 $\mu\text{M}$             |     |
|                                                                                                                              | MCF-7     | 2.6 $\mu\text{M}$             |     |
|                                                                                                                              | SW480     | 2.8 $\mu\text{M}$             |     |
| 6 $\beta$ ,14 $\alpha$ -dihydroxy-1 $\alpha$ ,7 $\beta$ -diacetoxy-7 $\alpha$ ,20-epoxy- <i>ent</i> -kaur-16-en-15-one (265) | HepG2     | 4.48 $\pm$ 0.24 $\mu\text{M}$ | 112 |
|                                                                                                                              | MCF-7     | 3.56 $\pm$ 0.16 $\mu\text{M}$ |     |
|                                                                                                                              | HL-60     | 1.42 $\pm$ 0.14 $\mu\text{M}$ |     |
| Isowikstroemin A (268)                                                                                                       | HL-60     | 2.51 $\pm$ 0.16 $\mu\text{M}$ | 115 |
|                                                                                                                              | SMMC-7721 | 1.02 $\pm$ 0.02 $\mu\text{M}$ |     |
|                                                                                                                              | A-549     | 0.88 $\pm$ 0.04 $\mu\text{M}$ |     |
|                                                                                                                              | MCF-7     | 2.1 $\pm$ 0.10 $\mu\text{M}$  |     |
|                                                                                                                              | SW480     | 1.22 $\pm$ 0.08 $\mu\text{M}$ |     |
| Isowikstroemin B (269)                                                                                                       | HL-60     | 2.48 $\pm$ 0.11 $\mu\text{M}$ | 115 |
|                                                                                                                              | SMMC-7721 | 3.78 $\pm$ 0.02 $\mu\text{M}$ |     |
|                                                                                                                              | A-549     | 3.34 $\pm$ 0.04 $\mu\text{M}$ |     |
|                                                                                                                              | MCF-7     | 2.28 $\pm$ 0.07 $\mu\text{M}$ |     |
|                                                                                                                              | SW480     | 2.40 $\pm$ 0.15 $\mu\text{M}$ |     |
| Isowikstroemin C (270)                                                                                                       | HL-60     | 3.79 $\pm$ 0.06 $\mu\text{M}$ | 115 |
|                                                                                                                              | SMMC-7721 | 4.72 $\pm$ 0.09 $\mu\text{M}$ |     |
|                                                                                                                              | A-549     | 7.00 $\pm$ 0.20 $\mu\text{M}$ |     |
|                                                                                                                              | MCF-7     | 5.35 $\pm$ 0.28 $\mu\text{M}$ |     |
|                                                                                                                              | SW480     | 4.23 $\pm$ 0.11 $\mu\text{M}$ |     |
| Isowikstroemin D (271)                                                                                                       | HL-60     | 2.97 $\pm$ 0.14 $\mu\text{M}$ | 115 |
|                                                                                                                              | SMMC-7721 | 3.65 $\pm$ 0.07 $\mu\text{M}$ |     |
|                                                                                                                              | A-549     | 3.84 $\pm$ 0.13 $\mu\text{M}$ |     |
|                                                                                                                              | MCF-7     | 3.37 $\pm$ 0.06 $\mu\text{M}$ |     |
|                                                                                                                              | SW480     | 2.51 $\pm$ 0.13 $\mu\text{M}$ |     |
| Isowikstroemin E (272)                                                                                                       | HL-60     | > 40 $\mu\text{M}$            | 115 |
|                                                                                                                              | SMMC-7721 | > 40 $\mu\text{M}$            |     |
|                                                                                                                              | A-549     | > 40 $\mu\text{M}$            |     |
|                                                                                                                              | MCF-7     | > 40 $\mu\text{M}$            |     |
|                                                                                                                              | SW480     | > 40 $\mu\text{M}$            |     |
| Isowikstroemin F (273)                                                                                                       | HL-60     | > 10 $\pm$ 1.22 $\mu\text{M}$ | 115 |
|                                                                                                                              | SMMC-7721 | > 10 $\pm$ 0.16 $\mu\text{M}$ |     |
|                                                                                                                              | A-549     | > 10 $\pm$ 1.02 $\mu\text{M}$ |     |
|                                                                                                                              | MCF-7     | > 40 $\mu\text{M}$            |     |
|                                                                                                                              | SW480     | > 10 $\pm$ 0.48 $\mu\text{M}$ |     |
| Isowikstroemin G (274)                                                                                                       | HL-60     | > 10 $\pm$ 0.54 $\mu\text{M}$ | 115 |
|                                                                                                                              | SMMC-7721 | > 10 $\pm$ 0.32 $\mu\text{M}$ |     |
|                                                                                                                              | A-549     | > 10 $\pm$ 0.75 $\mu\text{M}$ |     |
|                                                                                                                              | MCF-7     | 4.79 $\pm$ 0.21 $\mu\text{M}$ |     |
|                                                                                                                              | SW480     | 4.23 $\pm$ 0.01 $\mu\text{M}$ |     |
| Serrin E (276)                                                                                                               | HL-60     | 3.6 $\mu\text{M}$             | 116 |
|                                                                                                                              | SMMC-7721 | > 10 $\mu\text{M}$            |     |
|                                                                                                                              | A-549     | > 10 $\mu\text{M}$            |     |
|                                                                                                                              | MCF-7     | 4.1 $\mu\text{M}$             |     |
|                                                                                                                              | SW480     | 4.1 $\mu\text{M}$             |     |
| Serrin F (278)                                                                                                               | HL-60     | 0.7 $\mu\text{M}$             | 116 |
|                                                                                                                              | SMMC-7721 | 2.3 $\mu\text{M}$             |     |
|                                                                                                                              | A-549     | 3.7 $\mu\text{M}$             |     |
|                                                                                                                              | MCF-7     | 2.2 $\mu\text{M}$             |     |

|                                                                                      |           |                          |     |
|--------------------------------------------------------------------------------------|-----------|--------------------------|-----|
| 11-epi-rabdocoestin A (280)                                                          | SW480     | 3.4 $\mu$ M              | 116 |
|                                                                                      | HL-60     | 5.3 $\mu$ M              |     |
|                                                                                      | SMMC-7721 | 9.5 $\mu$ M              |     |
|                                                                                      | A-549     | > 10 $\mu$ M             |     |
|                                                                                      | MCF-7     | 5.3 $\mu$ M              |     |
| Laxiflorin R (287)                                                                   | SW480     | 6.6 $\mu$ M              | 117 |
|                                                                                      | HL-60     | 9.9 $\pm$ 1.6 $\mu$ M    |     |
|                                                                                      | SMMC-7721 | 21.5 $\pm$ 0.4 $\mu$ M   |     |
|                                                                                      | MCF-7     | 12.9 $\pm$ 0.2 $\mu$ M   |     |
|                                                                                      | A-549     | 24.9 $\pm$ 2.4 $\mu$ M   |     |
| Rabdonervosin I (6-hydroxy-3 $\alpha$ ,20-epoxy-5(6)-ene-ent-kaur-1,7,15-trione 285) | SW480     | 15.4 $\pm$ 0.7 $\mu$ M   | 67  |
|                                                                                      | HepG2     | 8.64 $\mu$ M             |     |
|                                                                                      | CNE2      | 9.77 $\mu$ M             |     |
|                                                                                      | PC-9/ZD   | > 20 $\mu$ M             |     |
|                                                                                      | HeLa      | > 20 $\mu$ M             |     |
| Isowikstroemin H (296)                                                               | HCT116    | > 20 $\mu$ M             | 121 |
|                                                                                      | HL-60     | 1.48 $\pm$ 0.32 $\mu$ M  |     |
|                                                                                      | SMMC-7721 | 2.93 $\pm$ 0.05 $\mu$ M  |     |
|                                                                                      | A-549     | 2.16 $\pm$ 0.16 $\mu$ M  |     |
|                                                                                      | MCF-7     | 2.22 $\pm$ 0.13 $\mu$ M  |     |
| Isowikstroemin J (298)                                                               | SW480     | 1.14 $\pm$ 0.08 $\mu$ M  | 121 |
|                                                                                      | HL-60     | 0.84 $\pm$ 0.02 $\mu$ M  |     |
|                                                                                      | SMMC-7721 | 2.21 $\pm$ 0.01 $\mu$ M  |     |
|                                                                                      | A-549     | 1.27 $\pm$ 0.03 $\mu$ M  |     |
|                                                                                      | MCF-7     | 1.25 $\pm$ 0.03 $\mu$ M  |     |
| Isowikstroemin K (299)                                                               | SW480     | 1.21 $\pm$ 0.08 $\mu$ M  | 121 |
|                                                                                      | HL-60     | 12.93 $\pm$ 0.84 $\mu$ M |     |
|                                                                                      | SMMC-7721 | 9.88 $\pm$ 0.56 $\mu$ M  |     |
|                                                                                      | A-549     | 10.94 $\pm$ 0.12 $\mu$ M |     |
|                                                                                      | MCF-7     | 8.78 $\pm$ 0.58 $\mu$ M  |     |
| Isowikstroemin L (300)                                                               | SW480     | 2.87 $\pm$ 0.09 $\mu$ M  | 121 |
|                                                                                      | HL-60     | 12.69 $\pm$ 0.72 $\mu$ M |     |
|                                                                                      | SMMC-7721 | 15.81 $\pm$ 0.15 $\mu$ M |     |
|                                                                                      | A-549     | 28.13 $\pm$ 3.26 $\mu$ M |     |
|                                                                                      | MCF-7     | 13.50 $\pm$ 0.54 $\mu$ M |     |
| Isolushinin H (320)                                                                  | SW480     | 4.23 $\pm$ 0.04 $\mu$ M  | 108 |
|                                                                                      | HL-60     | 2.5 $\mu$ M              |     |
|                                                                                      | SMMC-7721 | > 10 $\mu$ M             |     |
|                                                                                      | A-549     | > 10 $\mu$ M             |     |
|                                                                                      | SK-BR-3   | 6.1 $\mu$ M              |     |
| Wikstroemioidin V (325)                                                              | PANC-1    | 6.6 $\mu$ M              | 73  |
|                                                                                      | HL-60     | > 10 $\mu$ M             |     |
|                                                                                      | SMMC-7721 | 7.1 $\mu$ M              |     |
|                                                                                      | A-549     | > 10 $\mu$ M             |     |
|                                                                                      | MCF-7     | 7.3 $\mu$ M              |     |
| Xerophilinoid A (326)                                                                | SW480     | 4.0 $\mu$ M              | 86  |
|                                                                                      | K562      | 4.48 $\pm$ 1.40 $\mu$ M  |     |
|                                                                                      | NB4       | 10.09 $\pm$ 2.06 $\mu$ M |     |
|                                                                                      | NB4-R2    | 3.98 $\pm$ 0.87 $\mu$ M  |     |
|                                                                                      | T24       | 24.59 $\pm$ 3.67 $\mu$ M |     |
|                                                                                      | Me180     | 5.29 $\pm$ 1.34 $\mu$ M  |     |
|                                                                                      | BIU87     | 40.27 $\pm$ 1.94 $\mu$ M |     |
|                                                                                      | QGY-7202  | 19.52 $\pm$ 1.81 $\mu$ M |     |
|                                                                                      | 32D       | 4.90 $\pm$ 1.31 $\mu$ M  |     |
|                                                                                      | C8166     | > 25 $\mu$ M             |     |
| Xerophilusin I (327)                                                                 | SW480     | 0.04 $\mu$ M             | 85  |
|                                                                                      | K562      | 0.04 $\mu$ M             |     |
|                                                                                      | MKN45     | 2.8 $\mu$ M              |     |

|                                                                                                           |                          |                            |         |
|-----------------------------------------------------------------------------------------------------------|--------------------------|----------------------------|---------|
| Xerophilusin II ( <b>328</b> )                                                                            | HepG2                    | 0.19 $\mu$ M               | 85      |
|                                                                                                           | K562                     | 1.0 $\mu$ M                |         |
|                                                                                                           | MKN45                    | > 10 $\mu$ M               |         |
| 1 $\alpha$ ,7 $\alpha$ ,14 $\beta$ -trihydroxy-20-acetoxy- <i>ent</i> -kaur-15-one ( <b>330</b> )         | HepG2                    | 4.5 $\mu$ M                | 106     |
|                                                                                                           | HCT-116                  | 2.94 $\pm$ 0.06 $\mu$ M    |         |
|                                                                                                           | HepG2                    | 3.07 $\pm$ 0.02 $\mu$ M    |         |
|                                                                                                           | BGC-823                  | 5.59 $\pm$ 0.19 $\mu$ M    |         |
|                                                                                                           | NCI-H1650                | > 10 $\mu$ M               |         |
| 1 $\alpha$ ,7 $\alpha$ ,14 $\beta$ ,18-tetrahydroxy-20-acetoxy- <i>ent</i> -kaur-15-one ( <b>331</b> )    | A2780                    | 6.33 $\pm$ 0.34 $\mu$ M    | 106     |
|                                                                                                           | HCT-116                  | 2.45 $\pm$ 0.12 $\mu$ M    |         |
|                                                                                                           | HepG2                    | 3.21 $\pm$ 0.09 $\mu$ M    |         |
|                                                                                                           | BGC-823                  | 4.17 $\pm$ 0.25 $\mu$ M    |         |
|                                                                                                           | NCI-H1650                | > 10 $\mu$ M               |         |
| Luanchunin B ( <b>335</b> )                                                                               | A2780                    | 5.61 $\pm$ 0.19 $\mu$ M    | 128     |
|                                                                                                           | HL-60                    | 3.52 $\mu$ M               |         |
|                                                                                                           | SMMC-7721                | > 40 $\mu$ M               |         |
|                                                                                                           | A-549                    | > 40 $\mu$ M               |         |
|                                                                                                           | PANC-1                   | 29.83 $\mu$ M              |         |
|                                                                                                           | SK-BR-3                  | 16.58 $\mu$ M              |         |
| Sinuolatin E ( <b>342</b> )                                                                               | NB4                      | > 10 $\mu$ M               | 103     |
|                                                                                                           | A549                     | > 10 $\mu$ M               |         |
|                                                                                                           | SHSY5Y                   | 6.5 $\mu$ M                |         |
|                                                                                                           | PC-3                     | > 10 $\mu$ M               |         |
|                                                                                                           | MCF-7                    | > 10 $\mu$ M               |         |
|                                                                                                           | K562                     | 2.63 $\pm$ 0.21 $\mu$ M    |         |
| HepG2                                                                                                     | 20.46 $\pm$ 0.65 $\mu$ M |                            |         |
| Serrin D ( <b>349</b> )                                                                                   | HL60                     | 48.04 $\pm$ 4.77 $\mu$ M   | 138     |
|                                                                                                           | SMMC-7721                | 97.36 $\pm$ 4.67 $\mu$ M   |         |
|                                                                                                           | Hela                     | 128.35 $\pm$ 2.20 $\mu$ M  |         |
| Rabdonervosin H ( <b>350</b> )                                                                            | HepG2                    | 2.36 $\mu$ M               | 96      |
|                                                                                                           | CNE2                     | > 20 $\mu$ M               |         |
|                                                                                                           | PC-9/ZD                  | 6.07 $\mu$ M               |         |
|                                                                                                           | HeLa                     | > 20 $\mu$ M               |         |
|                                                                                                           | HCT116                   | > 20 $\mu$ M               |         |
|                                                                                                           | HL-60                    | 3.5 $\mu$ M                |         |
| SMMC-7721                                                                                                 | 4.7 $\mu$ M              |                            |         |
| A-549                                                                                                     | 1.2 $\mu$ M              |                            |         |
| Rabdosin F ( <b>363</b> )                                                                                 | MCF-7                    | 3.9 $\mu$ M                | 139     |
|                                                                                                           | SW-480                   | 3.9 $\mu$ M                |         |
|                                                                                                           | A549                     | 9.6 $\pm$ 0.2 $\mu$ M      |         |
|                                                                                                           | NCI-H661                 | Not active                 |         |
| Sculponeatin S ( <b>381</b> )                                                                             | K562                     | > 100 $\mu$ M              | 136     |
|                                                                                                           | HepG2                    | > 100 $\mu$ M              |         |
| Phyllostacin L ( <b>384</b> )                                                                             | HL-60                    | 15.4 $\mu$ M               | 143     |
|                                                                                                           | SMMC-7721                | 15.8 $\mu$ M               |         |
|                                                                                                           | A-549                    | 14.0 $\mu$ M               |         |
|                                                                                                           | MCF-7                    | 14.0 $\mu$ M               |         |
|                                                                                                           | SW-480                   | 15.2 $\mu$ M               |         |
|                                                                                                           | K562                     | 1.4 $\mu$ M                |         |
| A549                                                                                                      | 2.3 $\mu$ M              |                            |         |
| HepG2                                                                                                     | 2.0 $\mu$ M              |                            |         |
| 15 $\alpha$ -hydroxy-6,7-seco-1 $\alpha$ ,7:11 $\alpha$ ,6-diolide- <i>ent</i> -kaur-16-en ( <b>392</b> ) | HT-29                    | > 100 $\mu$ M              | 144     |
|                                                                                                           | BEL-7402                 | 33.59 $\mu$ M              |         |
|                                                                                                           | SK-OV-3                  | 74.05 $\mu$ M              |         |
|                                                                                                           | EC-1                     | 678.19 $\pm$ 39.25 $\mu$ M |         |
| Isodonhenrin A ( <b>393</b> )                                                                             | MCF-7                    | 563.90 $\pm$ 47.38 $\mu$ M | 144/145 |
|                                                                                                           | Hela                     | 365.17 $\pm$ 13.48 $\mu$ M |         |

|                                                                               |           |                   |     |
|-------------------------------------------------------------------------------|-----------|-------------------|-----|
|                                                                               | K562      | 238.16 ± 15.07 μM |     |
|                                                                               | A549      | 784.39 ± 25.97 μM |     |
|                                                                               | U87       | 487.25 ± 9.01 μM  |     |
| 15α-hydroxy-20-oxo-6,7-seco- <i>ent</i> -kaur-16-en-1,7α(6,11α)-diolide (394) | EC-1      | 37.69 ± 3.62 μM   | 145 |
|                                                                               | MCF-7     | 79.62 ± 6.33 μM   |     |
|                                                                               | Hela      | 80.07 ± 6.32 μM   |     |
|                                                                               | K562      | 197.35 ± 2.10 μM  |     |
|                                                                               | A549      | 462.13 ± 39.06 μM |     |
|                                                                               | U87       | 180.09 ± 11.44 μM |     |
| Isorubetin A (408)                                                            | NB4       | > 50 μM           | 146 |
|                                                                               | A549      | > 50 μM           |     |
|                                                                               | SHSY5Y    | 48.70 μM          |     |
|                                                                               | PC3       | > 50 μM           |     |
|                                                                               | MCF7      | > 50 μM           |     |
| Isorubetin B (409)                                                            | NB4       | > 50 μM           | 146 |
|                                                                               | A549      | > 50 μM           |     |
|                                                                               | SHSY5Y    | 11.55 μM          |     |
|                                                                               | PC3       | > 50 μM           |     |
|                                                                               | MCF7      | > 50 μM           |     |
| Isorubetin C (410)                                                            | NB4       | 27.32 μM          | 146 |
|                                                                               | A549      | > 50 μM           |     |
|                                                                               | SHSY5Y    | 19.11 μM          |     |
|                                                                               | PC3       | 82.10 μM          |     |
|                                                                               | MCF7      | > 50 μM           |     |
| Isorubetin D (411)                                                            | NB4       | > 50 μM           | 146 |
|                                                                               | A549      | > 50 μM           |     |
|                                                                               | SHSY5Y    | 9.21 μM           |     |
|                                                                               | PC3       | > 50 μM           |     |
|                                                                               | MCF7      | > 50 μM           |     |
| Parvifoline AB (412)                                                          | A549      | > 100 μM          | 42  |
|                                                                               | HT-29     | > 100 μM          |     |
|                                                                               | K562      | > 100 μM          |     |
| Ternifolide C (416)                                                           | HL-60     | 3.38 μM           | 147 |
|                                                                               | SMMC-7721 | 4.27 μM           |     |
|                                                                               | A-549     | 3.16 μM           |     |
|                                                                               | MCF-7     | 3.46 μM           |     |
|                                                                               | SW-480    | 3.60 μM           |     |
| Sculponin T (417)                                                             | HL-60     | 17.1 μM           | 148 |
|                                                                               | SMMC-7721 | 22.2 μM           |     |
|                                                                               | A-549     | > 40 μM           |     |
|                                                                               | MCF-7     | 27.7 μM           |     |
|                                                                               | SW-480    | 13.4 μM           |     |
| Sculponeatin N (420)                                                          | K562      | 0.21 ± 0.03 μM    | 136 |
|                                                                               | HepG2     | 0.29 ± 0.03 μM    |     |
| Sculponeatin O (421)                                                          | K562      | 0.34 ± 0.04 μM    | 136 |
|                                                                               | HepG2     | 0.39 ± 0.05 μM    |     |
| Sculponeatin P (422)                                                          | K562      | > 100 μM          | 136 |
|                                                                               | HepG2     | > 100 μM          |     |
| Phyllostacin E (438)                                                          | K562      | 28.53 μM          | 87  |
|                                                                               | HL60      | 18.56 μM          |     |
|                                                                               | HepG2     | 15.58 μM          |     |
| Sculponeatin Q (439)                                                          | K562      | > 100 μM          | 136 |
|                                                                               | HepG2     | > 100 μM          |     |
| Laxiflorolide C (441)                                                         | HL-60     | 4.8 ± 0.1 μM      | 149 |
|                                                                               | SMMC-7721 | 14.9 ± 0.3 μM     |     |
|                                                                               | A-549     | 18.8 ± 1.0 μM     |     |
|                                                                               | MCF-7     | 15.1 ± 0.5 μM     |     |

|                        |           |                   |     |
|------------------------|-----------|-------------------|-----|
| Maoecrystal Z (443)    | SW-480    | 7.9 ± 2.4 μM      |     |
|                        | K562      | 2.90 ± 0.28 μg/mL | 152 |
|                        | MCF7      | 1.63 ± 0.34 μg/mL |     |
|                        | A2780     | 1.45 ± 0.03 μg/mL |     |
| Parvifoline Y (445)    | A549      | 4.97 μM           | 156 |
|                        | HT-29     | 12.44 μM          |     |
|                        | K562      | 5.81 μM           |     |
| Parvifoline AA (447)   | A549      | 4.12 ± 0.25 μM    | 42  |
|                        | HT-29     | 12.78 ± 0.89 μM   |     |
|                        | K562      | 5.26 ± 0.31 μM    |     |
| Bisrubescensin A (449) | A549      | 0.54 μM           | 161 |
|                        | HT-29     | 1.48 μM           |     |
|                        | K562      | 1.85 μM           |     |
| Sculponin D (456)      | K562      | 1.50 μM           | 101 |
|                        | A549      | 1.00 μM           |     |
|                        | HepG2     | 1.12 μM           |     |
| Sculponin E (457)      | K562      | 2.00 μM           | 101 |
|                        | A549      | 1.85 μM           |     |
|                        | HepG2     | 1.62 μM           |     |
| Bistenuifolin B (469)  | HL-60     | 4.6 μM            | 167 |
|                        | SMMC-7721 | 9.9 μM            |     |
|                        | A-549     | > 10 μM           |     |
|                        | MCF-7     | 4.2 μM            |     |
|                        | SW-480    | 4.0 μM            |     |
| Hispidanin B (482)     | SGC7901   | 10.7 μM           | 168 |
|                        | SMMC-7721 | 9.8 μM            |     |
|                        | K562      | 13.7 μM           |     |
| Luanchunin A (487)     | HL-60     | 4.81 μM           | 128 |
| Alboatisin A (508)     | A549      | 10.5 μM           | 174 |
|                        | HT-29     | 8.3 μM            |     |
|                        | K562      | 12.5 μM           |     |
| Alboatisin B (509)     | A549      | 15.6 μM           | 174 |
|                        | HT-29     | 7.9 μM            |     |
|                        | K562      | 20.6 μM           |     |
| Alboatisin C (510)     | A549      | 24.6 μM           | 174 |
|                        | HT-29     | 13.6 μM           |     |
|                        | K562      | 28.0 μM           |     |
| Isorubescins E (513)   | NB4       | > 50 μM           | 146 |
|                        | A549      | > 50 μM           |     |
|                        | SHSY5Y    | 22.64 μM          |     |
|                        | PC3       | > 50 μM           |     |
|                        | MCF7      | > 50 μM           |     |
| Hebeiabinin A (531)    | A549      | 53.21 μM          | 182 |
|                        | HT-29     | 15.88 μM          |     |
|                        | K562      | 42.71 μM          |     |
| Hebeiabinin D (534)    | A549      | 5.05 μM           | 182 |
|                        | HT-29     | 5.03 μM           |     |
|                        | K562      | 7.66 μM           |     |
| Hebeiabinin E (535)    | A549      | 0.91 μM           | 182 |
|                        | HT-29     | 1.81 μM           |     |
|                        | K562      | 4.07 μM           |     |
| Laxiflorin P (541)     | HL-60     | 3.8 ± 0.2 μM      | 117 |
|                        | SMMC-7721 | 5.6 ± 0.6 μM      |     |
|                        | MCF-7     | 3.2 ± 0.03 μM     |     |
|                        | A549      | 11.7 ± 1.2 μM     |     |
|                        | SW480     | 3.1 ± 0.1 μM      |     |
| Laxiflorin Q (542)     | HL-60     | > 40 μM           | 117 |

|                                     |           |                                |     |
|-------------------------------------|-----------|--------------------------------|-----|
|                                     | SMMC-7721 | > 40 $\mu\text{M}$             |     |
|                                     | MCF-7     | > 40 $\mu\text{M}$             |     |
|                                     | A549      | > 40 $\mu\text{M}$             |     |
|                                     | SW480     | > 40 $\mu\text{M}$             |     |
| Eriocasin B (546)                   | HT-29     | > 10 $\mu\text{M}$             | 66  |
|                                     | BEL-7402  | > 10 $\mu\text{M}$             |     |
|                                     | SK-OV-3   | 5.7 $\mu\text{M}$              |     |
| 3 $\beta$ -acetoxyeriacasin D (548) | HT-29     | > 10 $\mu\text{M}$             | 66  |
|                                     | BEL-7402  | > 10 $\mu\text{M}$             |     |
|                                     | SK-OV-3   | 5.1 $\mu\text{M}$              |     |
| Isolophanthin A (554)               | HL-60     | 19.4 $\mu\text{M}$             | 189 |
|                                     | A549      | 12.5 $\mu\text{M}$             |     |
|                                     | MOLT-4    | 3.8 $\mu\text{M}$              |     |
|                                     | BEL-7402  | 0.5 $\mu\text{M}$              |     |
| Isolophanthin B (555)               | HL-60     | 55.2 $\mu\text{M}$             | 189 |
|                                     | A549      | 50.0 $\mu\text{M}$             |     |
|                                     | MOLT-4    | 25.6 $\mu\text{M}$             |     |
|                                     | BEL-7402  | 32.4 $\mu\text{M}$             |     |
| Gerardianin B (557)                 | HeLa      | 28.32 $\mu\text{M}$            | 190 |
|                                     | HCF-8     | 36.54 $\mu\text{M}$            |     |
|                                     | HepG2     | 24.68 $\mu\text{M}$            |     |
| Gerardianin C (558)                 | HeLa      | > 50 $\mu\text{M}$             | 190 |
|                                     | HCF-8     | 17.03 $\mu\text{M}$            |     |
|                                     | HepG2     | 26.32 $\mu\text{M}$            |     |
| 16-acetoxyisugiol (560)             | A549      | 12.34 $\pm$ 1.40 $\mu\text{M}$ | 192 |
|                                     | MCF-7     | 1.79 $\pm$ 0.08 $\mu\text{M}$  |     |
|                                     | HeLa      | 15.92 $\pm$ 1.42 $\mu\text{M}$ |     |
| Graciliflorin E (561)               | A549      | 20.90 $\pm$ 2.21 $\mu\text{M}$ | 192 |
|                                     | MCF-7     | 20.61 $\pm$ 2.33 $\mu\text{M}$ |     |
|                                     | HeLa      | 22.82 $\pm$ 3.72 $\mu\text{M}$ |     |
| 15-hydroxy-20-deoxocarnosol (564)   | A549      | 14.10 $\pm$ 1.02 $\mu\text{M}$ | 192 |
|                                     | MCF-7     | 11.72 $\pm$ 0.30 $\mu\text{M}$ |     |
|                                     | HeLa      | 17.41 $\pm$ 0.93 $\mu\text{M}$ |     |
| 15-hydroxy-1-oxosalvibretol (565)   | A549      | > 152.44 $\mu\text{M}$         | 192 |
|                                     | MCF-7     | > 152.44 $\mu\text{M}$         |     |
|                                     | HeLa      | > 152.44 $\mu\text{M}$         |     |
| Isoabietenin C (578)                | HL-60     | 4.7 $\mu\text{M}$              | 75  |
|                                     | SMMC-7721 | > 10 $\mu\text{M}$             |     |
|                                     | A-549     | > 10 $\mu\text{M}$             |     |
|                                     | MCF-7     | > 10 $\mu\text{M}$             |     |
|                                     | SW-480    | > 10 $\mu\text{M}$             |     |
| Isolophanthin C (583)               | HL-60     | 86.4 $\mu\text{M}$             | 189 |
|                                     | A549      | 93.7 $\mu\text{M}$             |     |
|                                     | MOLT-4    | 82.3 $\mu\text{M}$             |     |
|                                     | BEL-7402  | 90.3 $\mu\text{M}$             |     |
| 3 $\beta$ -hydroxysempervirol (586) | A549      | 16.42 $\pm$ 1.89 $\mu\text{M}$ | 192 |
|                                     | MCF-7     | 7.78 $\pm$ 2.25 $\mu\text{M}$  |     |
|                                     | HeLa      | 33.84 $\pm$ 5.23 $\mu\text{M}$ |     |
| Isoscoparin P (600)                 | HL-60     | > 40 $\mu\text{M}$             | 202 |
|                                     | SMMC-7721 | > 40 $\mu\text{M}$             |     |
|                                     | A549      | > 40 $\mu\text{M}$             |     |
|                                     | MCF-7     | > 40 $\mu\text{M}$             |     |
|                                     | SW480     | > 40 $\mu\text{M}$             |     |
| Scopariusic acid (607)              | HL-60     | 18.07 $\mu\text{M}$            | 202 |
|                                     | SMMC-7721 | 17.28 $\mu\text{M}$            |     |
|                                     | A549      | 16.55 $\mu\text{M}$            |     |
|                                     | MCF-7     | 22.54 $\mu\text{M}$            |     |
|                                     | SW480     | 26.62 $\mu\text{M}$            |     |
